# Supplementary material
Source: PubMed Central journal article supplement (PMC3973098)

## SUPPLEMENTAL MATERIAL

### **IL-6R/STAT3/miR-34a feedback controls EMT, invasion and metastasis of colorectal cancer**

Matjaz Rokavec, Meryem Gülfem Öner, Huihui Li, Rene Jackstadt, Jiang Longchang, Dimitri Lodygin, Markus Kaller, David Horst, Paul K. Ziegler, Sarah Schwitalla, Julia Slotta-Huspenina, Franz G. Bader, Florian R. Greten, and Heiko Hermeking

#### **Inventory of Supplemental Information**

- **Supplemental Figure 1**
- **Supplemental Figure 2**
- **Supplemental Figure 3**
- **Supplemental Figure 4**
- **Supplemental Figure 5**
- **Supplemental Figure 6**
- **Supplemental Figure 7**
- **Supplemental Table 1.** Oligonucleotides used for qPCR
- **Supplemental Table 2.** Oligonucleotides used for qChIP
- **Supplemental Table 3.** Oligonucleotides used for *IL6R*-3'UTR cloning and mutagenesis
- **Supplemental Table 4.** Oligonucleotides used for genotyping of *miR-34a*<sup>-/-</sup> mice
- **Supplemental Table 5.** List of antibodies

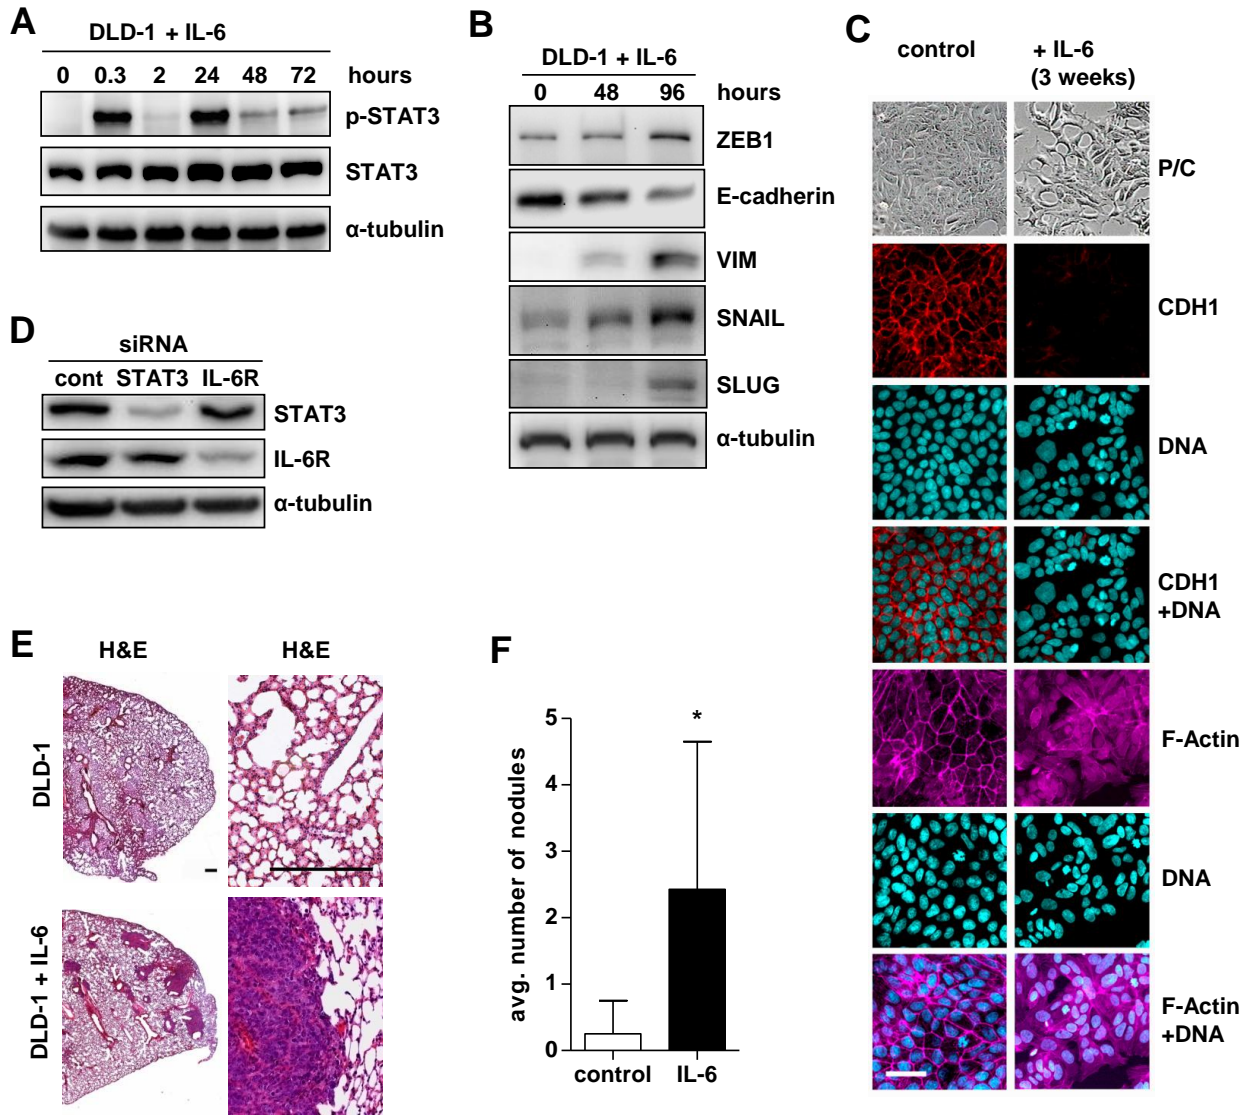

**Supplemental Figure 1. IL-6 induces EMT, invasion, and metastasis of DLD-1 cells.**

**(A)** Western blot analysis of p-STAT3-Y705 phosphorylation and STAT3 expression in DLD-1 cells after IL-6 treatment for the indicated periods. **(B)** Western blot analysis of indicated proteins in DLD-1 cells treated with IL-6 for indicated periods. **(C)** Indirect immunofluorescence detections of indicated proteins in DLD-1 cells treated with IL-6 as indicated. Pictures were taken with phase contrast (P/C) and confocal microscopy. Scale bar in the upper right panel represents 25 μm. **(D)** Western blot analysis of the indicated proteins in DLD-1 cells transfected with STAT3- or IL-6R-specific siRNAs. **(E, F)** Formation of lung metastases by DLD-1 cells in immune-compromised NOD/SCID mice. H&E staining of lungs **(E)** and quantification of metastatic tumor nodules in the lung per mouse ten weeks after tail vein injection are shown **(F)**. Scale bars represent 200 μm. In panel **F** mean values ± SD (n=3) are provided.

(\*)  $P < 0.05$

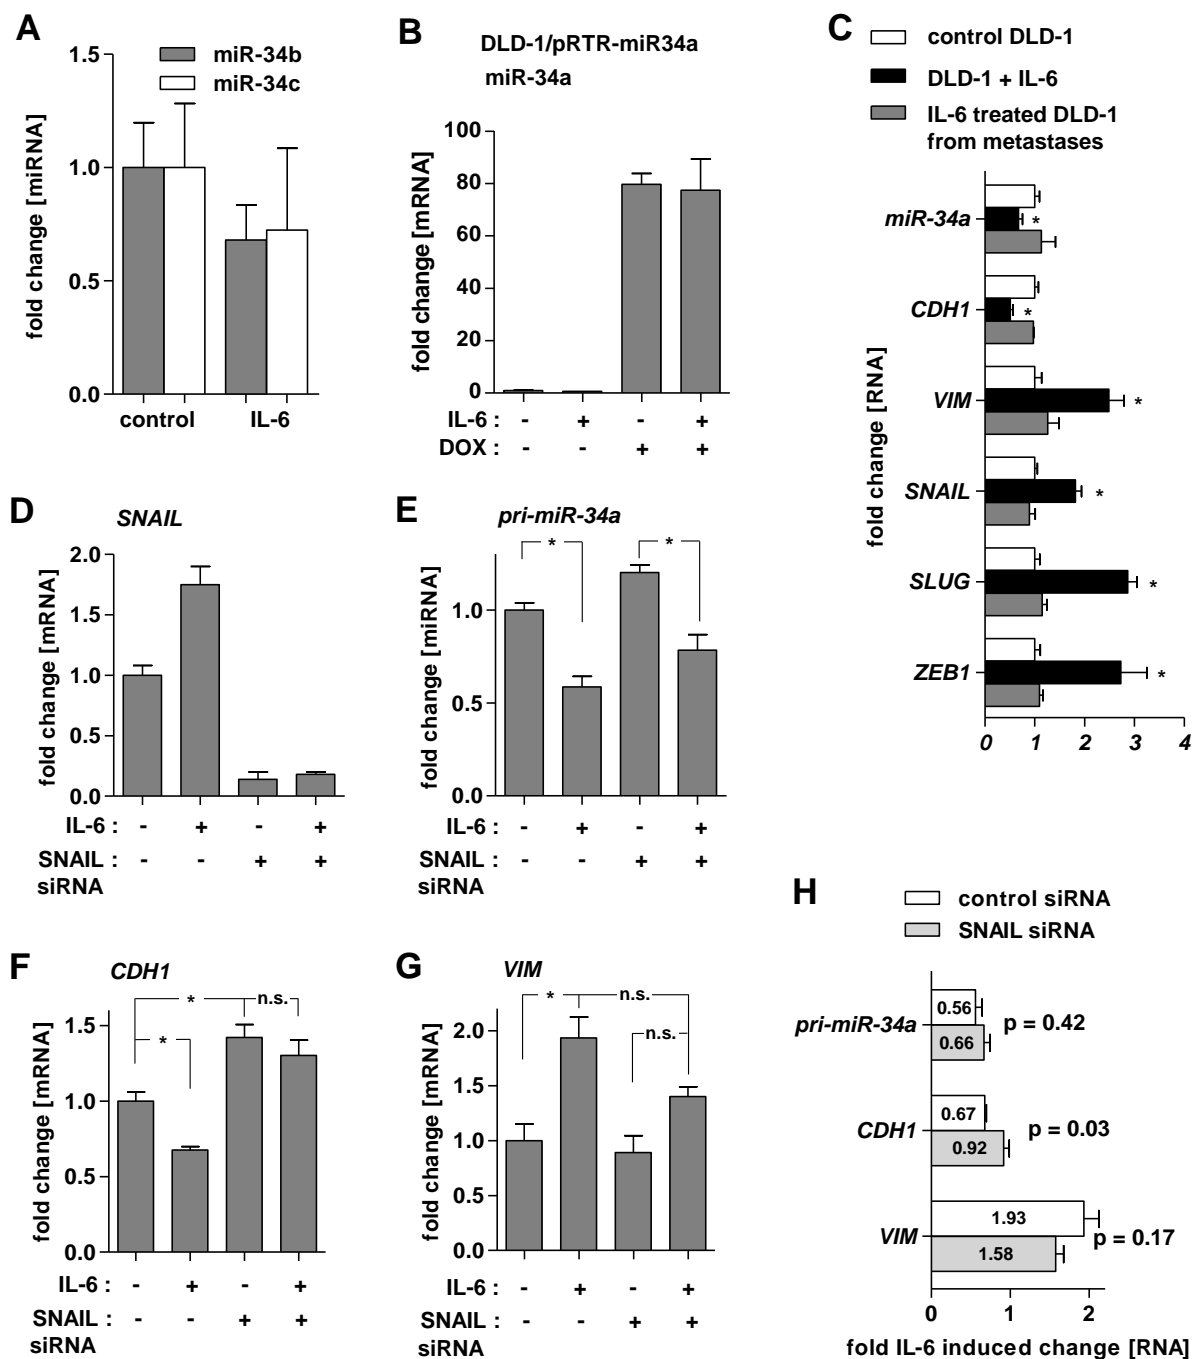

**Supplemental Figure 2. IL-6-induced EMT and invasion of colorectal cancer cells are mediated by direct repression of miR-34a by STAT3.** (A) qPCR detection of mature miR-34b and miR-34c expression in DLD-1 cells after treatment with IL-6 for 72 hours. (B) miR-34a expression in DLD-1 cells stably harboring an episomal DOX-inducible pRTR/miR-34a expression plasmid. Cells were treated with IL-6 and/or DOX for 48 hours. (C) qPCR analyses of the indicated genes in parental (control) DLD-1 cells, DLD-1 cells treated with IL-6 for 5 days, and cells explanted from lung metastases that formed from IL-6 treated DLD-1 cells. (D, E, F, G, H) qPCR analysis of *SNAIL* (D), *pri-miR-34a* (E), *CDH1* (F), and *VIM* (G) expression in DLD-1 cells transfected with control or *SNAIL* siRNAs for 24 hours and subsequently treated with IL-6 for 72 hours. (H) Fold IL-6 induced changes in expression of indicated genes with control or *SNAIL*-specific siRNA. In panels A - H mean values  $\pm$  SD (n=3) are provided. (\*)  $P < 0.05$

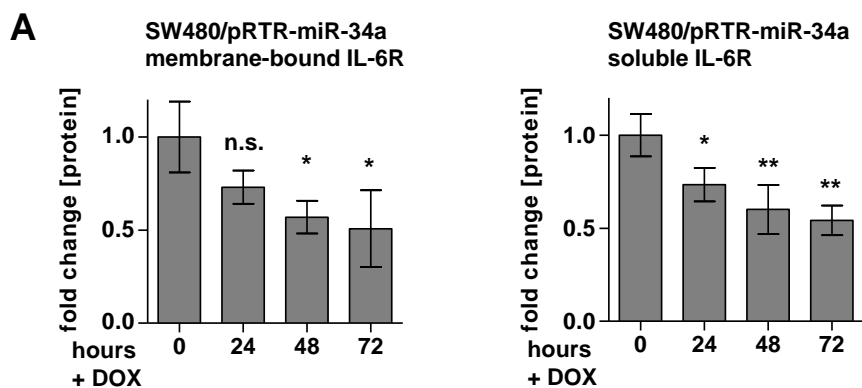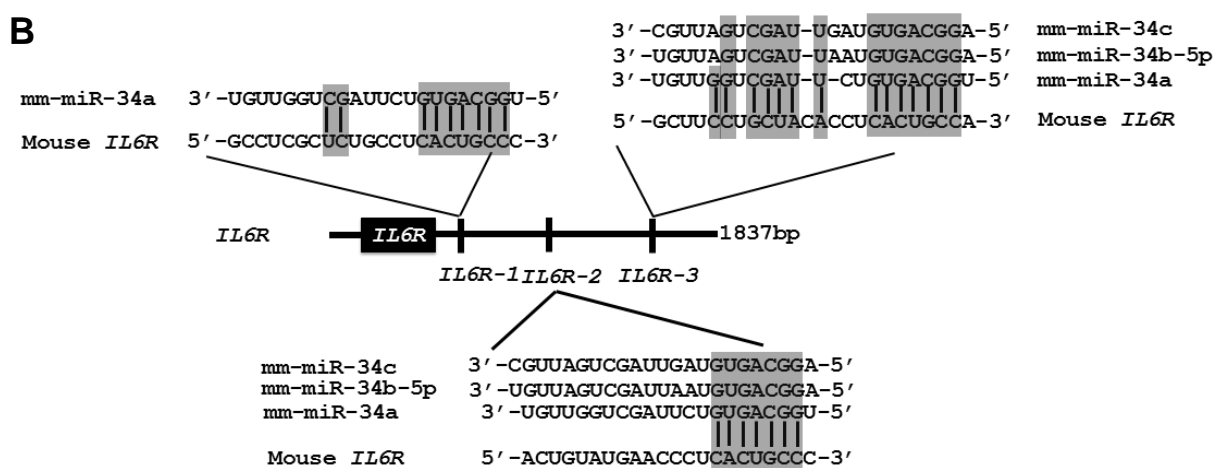

**Supplemental Figure 3. *IL6R* is a direct target of miR-34.**

(A) Densitometric quantification of membrane-bound (left) and soluble (right) IL-6R protein expression with normalization to  $\beta$ -actin in SW480/pRTR-miR-34a cells after treatment with DOX (see also Figure 2C). (B) Schematic representation of the mouse *IL6R* 3'-UTR with the miR-34 seed-matching sequences. In panels A and B mean values  $\pm$  SD (n=3) are provided. (\*)  $P < 0.05$  and (\*\*)  $P < 0.01$ .

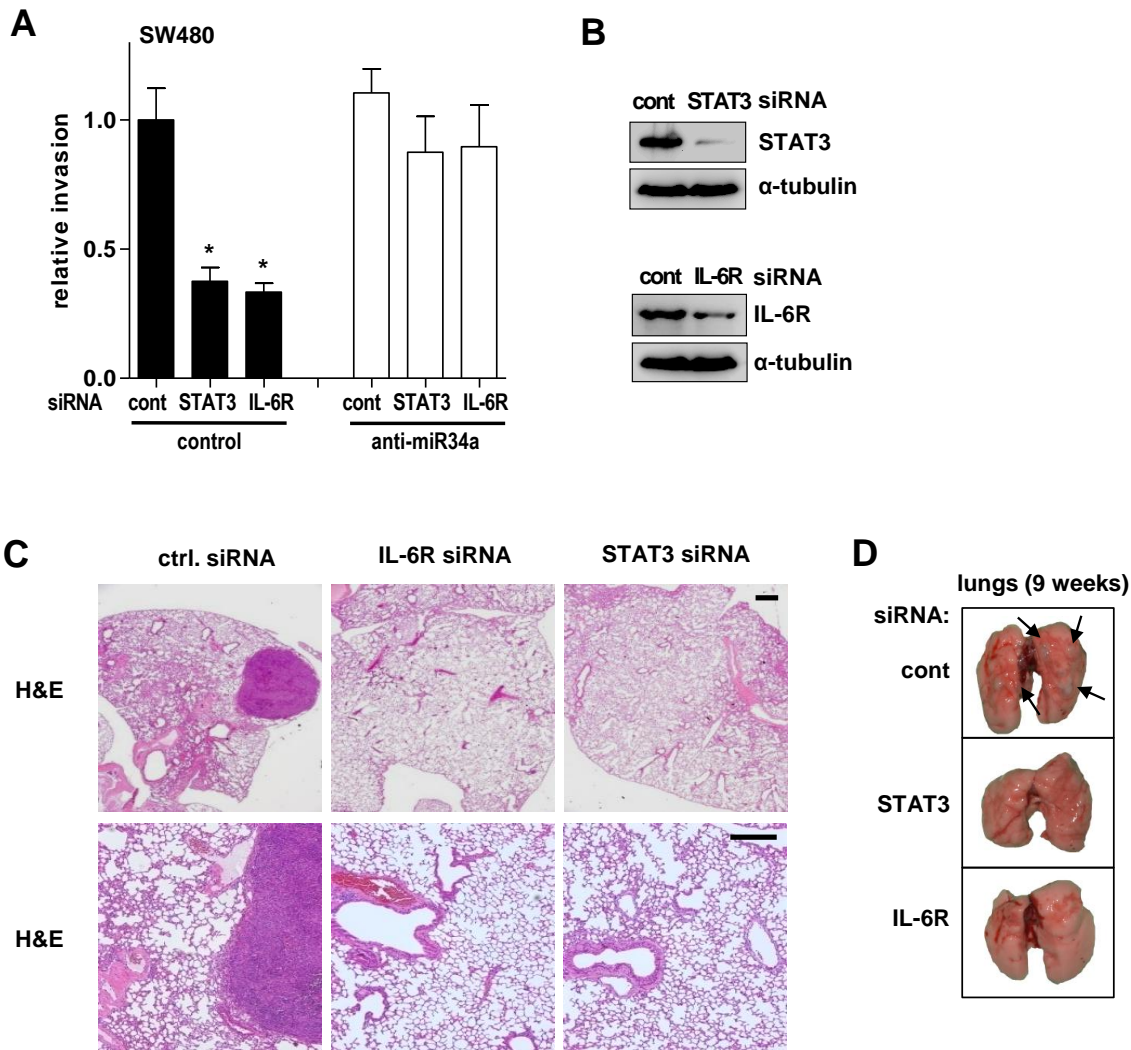

**Supplemental Figure 4. The mesenchymal phenotype of cancer cell lines is associated with an active IL-6R/STAT3/miR-34a loop.**

**(A)** Knockdown of STAT3 or IL-6R suppresses invasion in a miR-34a-dependent manner. SW480 cells were transfected with STAT3 or IL-6R siRNA and miR-34a antagonists. Subsequently, cells were allowed to migrate through a matrigel-coated filter for 48 hours and counted using DAPI staining. **(B)** SW620-luc2 cells were transfected with control, STAT3-, or IL-6R-specific siRNAs for 48 hours. Expression of the indicated proteins was determined by Western blot analysis. **(C, D)** Representative examples of H&E stained lungs **(C)** and images of lungs **(D)** after tail vein injection of SW620 cells transfected with the respective siRNAs. Scale bars represent 200  $\mu$ m. In panel **A** mean values  $\pm$  SD ( $n=3$ ) are provided. (\*)  $P < 0.05$

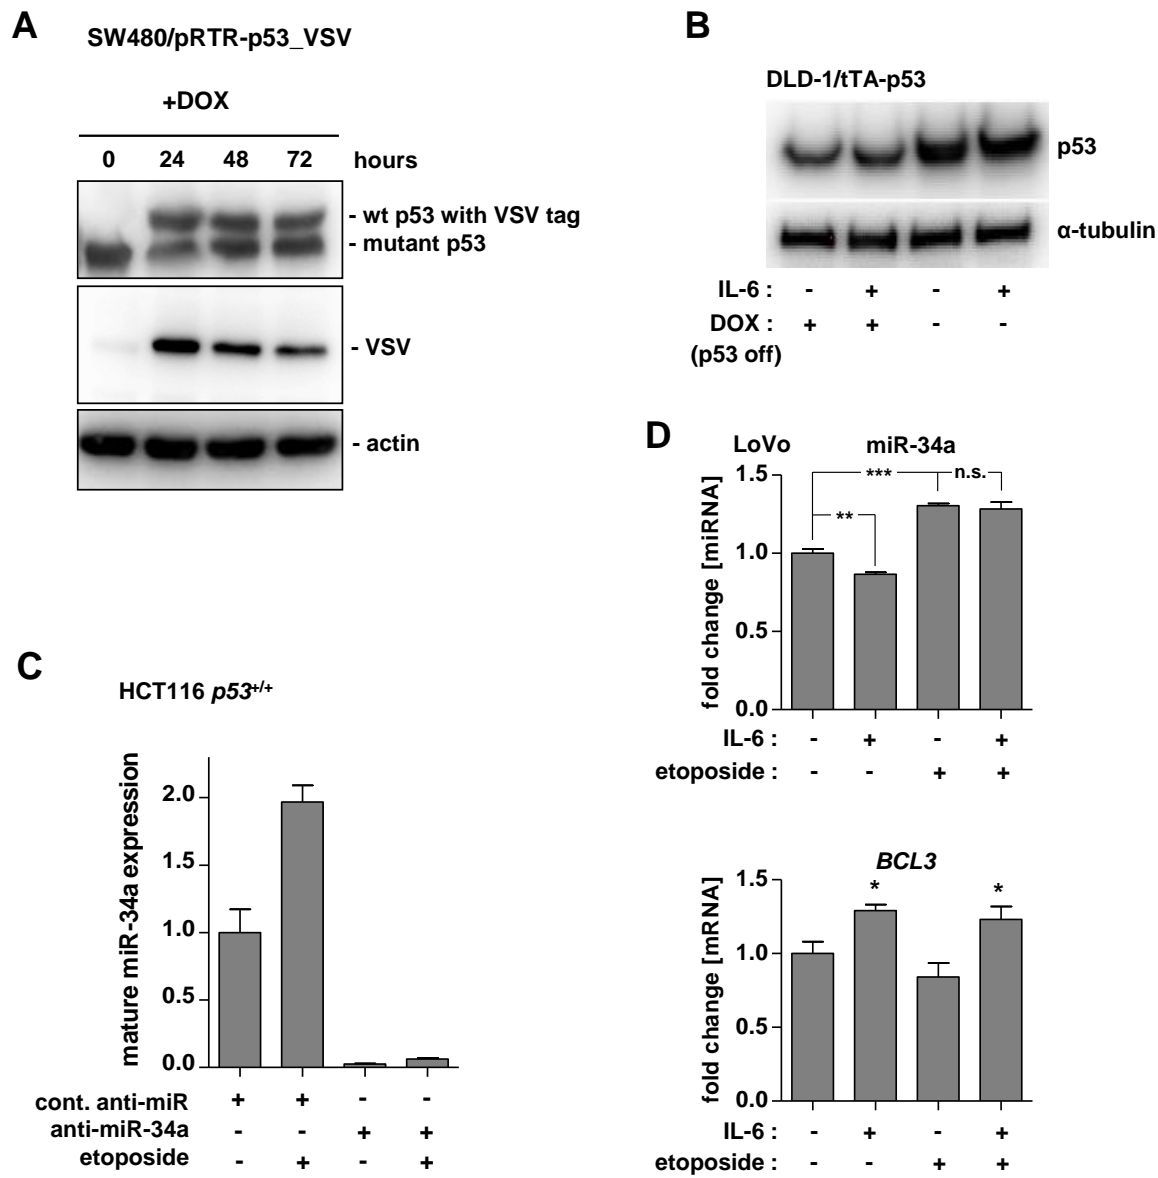

**Supplemental Figure 5. p53 disrupts the IL-6R/STAT3/miR-34a feed-back loop by inducing miR-34a.** (A) Western blot analysis of p53 and VSV protein expression in SW480/pRTR-p53\_VSV cells after treatment with DOX for indicated periods. (B) Western blot analysis of p53 expression after removal of DOX and IL-6 for 72 hours (please note that in DLD-1\_tTA\_p53 cells the expression of ectopic wild-type p53 is induced after the removal of DOX). (C) Expression of mature miR-34a in HCT116 p53<sup>+/+</sup> cells transfected with control or anti-miR-34a oligos followed by treatment with etoposide for 48 hours. (D) Expression of mature miR-34a (upper) and the IL-6/STAT3 target *BCL3* (lower) in LoVo cells treated with etoposide and IL-6 for 72h. In panels C and D mean values  $\pm$  SD (n=3) are provided. (\*)  $P < 0.05$ ; (\*\*)  $P < 0.01$  and (\*\*\*)  $P < 0.001$ .

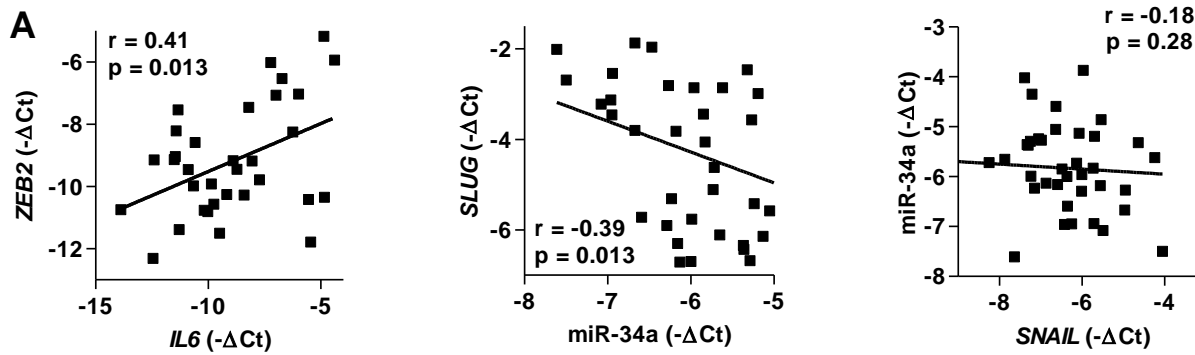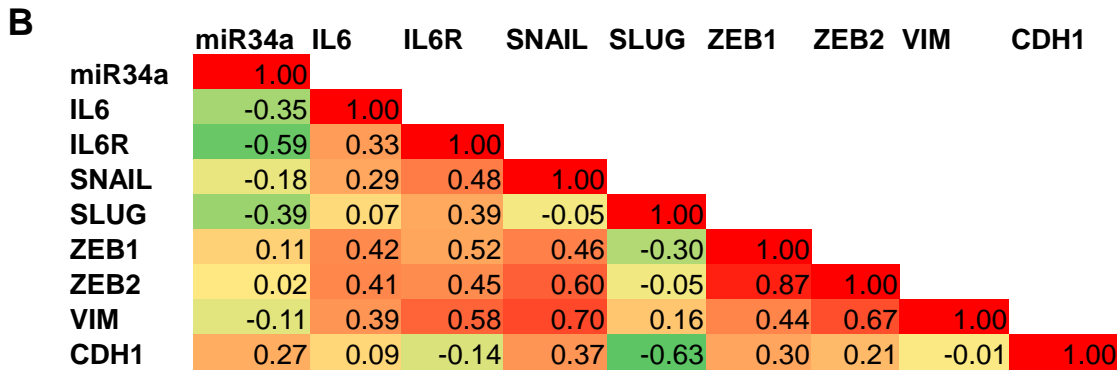

Approximately  $r > 0.3$  or  $< -0.3$  is significant

**Supplemental Figure 6. Evidence for the presence of the IL-6R/STAT3/miR-34a feed-back loop in primary CRC tumors.**

**(A, B)** Correlations of the indicated mRNAs and miRNAs in the TUM human colon tumor collection ( $n = 48$ ). The significance was calculated using the Spearman correlation coefficient.

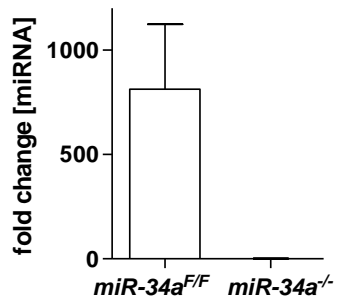

**Supplemental Figure 7. Loss of miR-34a facilitates the formation of invasive colorectal tumors in the AOM/DSS mouse model.** Expression of miR-34a in intestine epithelia of indicated mice.



**Supplemental Table 1. Oligonucleotides used for qPCR**

| <b>gene</b>        | <b>forward</b>         | <b>reverse</b>         |
|--------------------|------------------------|------------------------|
| <i>GAPDH</i>       | TGTTGCCATCAATGACCCCTT  | CTCCACGACGTACTIONCAGCG |
| <i>BCL3</i>        | CCCTATACCCCATGATGTGC   | TACCCTGCACCACAGCAATA   |
| <i>CDH1</i>        | CCCGGGACAACGTTTATTAC   | GCTGGCTCAAGTCAAAGTCC   |
| <i>IL6R</i>        | TTGTTTGTGAGTGGGGTCCT   | TGGGACTCCTGGGAATACTG   |
| <i>JAK2</i>        | CCTTGTACTTCACGATGTTGTC | GTGGAGATGTGCCGCTATG    |
| <i>pri-miR-34a</i> | CGTCACCTCTTAGGCTTGGA   | CATTGGTGTCGTTGTGCT     |
| <i>SLUG</i>        | GGGGAGAAGCCTTTTTCTTG   | TCCTCATGTTTGTGCAGGAG   |
| <i>SOCS3</i>       | GACTTCGATTCGGGACCA     | GGAAACTTGCTGTGGGTGAC   |
| <i>STAT3</i>       | GGGAAGAATCACGCCTTCTAC  | ATCTGCTGCTTCTCCGTCAC   |
| <i>SNAIL</i>       | GCACATCCGAAGCCACAC     | GGAGAAGGTCCGAGCACAC    |
| <i>VIM</i>         | TACAGGAAGCTGCTGGAAGG   | ACCAGAGGGAGTGAATCCAG   |
| <i>ZEB1</i>        | TCAAAGGAAGTCAATGGACAA  | GTGCAGGAGGGACCTCTTTA   |

**Supplemental Table 2. Oligonucleotides used for qChIP**

| <b>gene</b>    | <b>forward</b>       | <b>reverse</b>          |
|----------------|----------------------|-------------------------|
| <i>AchR</i>    | CCTTCATTGGGATCACCACG | AGGAGATGAGTACCAGCAGGTTG |
| <i>miR-34a</i> | GGAATCCTTTCTCCCCAGAG | GTAGCCTCCGTAAGGGGAAG    |

**Supplemental Table 3. Oligonucleotides used for *IL6R*-3'UTR cloning and mutagenesis**

| <b>gene</b>                              | <b>forward</b>                                        | <b>reverse</b>                                         |
|------------------------------------------|-------------------------------------------------------|--------------------------------------------------------|
| human <i>IL6R</i> 3'-UTR                 | GTTTTCCACTGTGGGCTTGT                                  | TACTGACCCTTTGCCCA<br>TA                                |
| human <i>IL6R</i> 3'-UTR<br>site1 mutant | CTCAGCAAAGATGCTTCTC<br>AGTCGGATGCCAGCTTATC<br>TCAGGGG | CCCCTGAGATAAGCTGG<br>CATCCGACTGAGAAGCAT<br>CTTTTGCTGAG |
| human <i>IL6R</i> 3'-UTR<br>site2 mutant | GTTTCTGCAGCACCCCCAG<br>TCGGTTGAGTCCCCAGCAG<br>TG      | CACTGCTGGGGACTCAA<br>CCGACTGGGGGTGCTGC<br>AGAAAC       |
| mouse <i>IL6R</i> 3'-UTR                 | CCACGAGATCAGCACACAA<br>G                              | CTAGAGCGGACAAGCAG<br>AGG                               |

**Supplemental Table 4. Oligonucleotides used for genotyping of *miR-34a*<sup>-/-</sup> mice**

| oligo | sequence             |
|-------|----------------------|
| a     | ACCTTGCAGGTGCTCAGAAT |
| b     | TGGAGCTAACGGAGTGTGTG |
| c     | CTACCCAAGCTCGACGAAGT |
| d     | TGCAGCACTTCTAGGGCAGT |

**Supplemental Table 5. List of antibodies**

**Primary antibodies**

| epitope              | species        | catalog no. | company              | use     | dilution       | source |
|----------------------|----------------|-------------|----------------------|---------|----------------|--------|
| Vimentin             | human          | #2707-1     | Epitomics            | WB      | 1:5000         | rabbit |
| E-cadherin           | human          | #334000     | Invitrogen           | WB; IF  | 1:1000; 1:50   | mouse  |
| p53                  | human          | #sc-126     | Santa Cruz           | WB      | 1:1000         | mouse  |
| α-tubulin            | human<br>mouse | #T-9026     | Sigma                | WB      | 1:1000         | mouse  |
| ZEB1                 | human<br>mouse | #sc-25388   | Santa Cruz           | WB      | 1:1000         | rabbit |
| SNAIL                | human          | #3879S      | Cell Signaling       | WB      | 1:500          | rabbit |
| SNAIL                | mouse          | #NBP1-19529 | Novus<br>Biosciences | WB      | 1:500          | rabbit |
| SNAIL                | mouse          | AP20370PU-N | Acris                | IHC     | 1:150          | rabbit |
| IL-6R                | human<br>mouse | #sc-661     | Santa Cruz           | WB; IHC | 1:1000; 1: 500 | rabbit |
| STAT3                | human          | #sc-482     | Santa Cruz           | WB      | 1:1000         | rabbit |
| p-STAT3              | human<br>mouse | #9145 XP    | Cell Signaling       | WB; IHC | 1:1000; 1: 300 | rabbit |
| cleaved<br>Caspase-3 | mouse          | #96618      | Cell Signaling       | IHC     | 1: 300         | rabbit |
| BrdU                 |                | #MCA2060    | AbD Serotec          | IHC     | 1: 400         | rat    |

**Secondary antibodies or conjugates**

| name                                          | ordering no. | company    | use | dilution | source |
|-----------------------------------------------|--------------|------------|-----|----------|--------|
| anti-mouse HRP                                | # W4021      | Promega    | WB  | 1:10.000 | goat   |
| anti-rabbit HRP                               | # A0545      | Sigma      | WB  | 1:10.000 | goat   |
| anti-rat-biotin                               | # E0468      | Dako       | IHC | 1 : 500  | rabbit |
| anti-rabbit-biotin                            | # E0432      | Dako       | IHC | 1 : 600  | goat   |
| Alexa Flour 555-<br>conjugated anti-<br>mouse | # A21422     | Invitrogen | IF  | 1:500    | goat   |
| Phalloidin conjugated<br>Alexa-647            | # A22287     | Invitrogen | IF  | 1:40     |        |

# Full unedited gel for Figure 2C

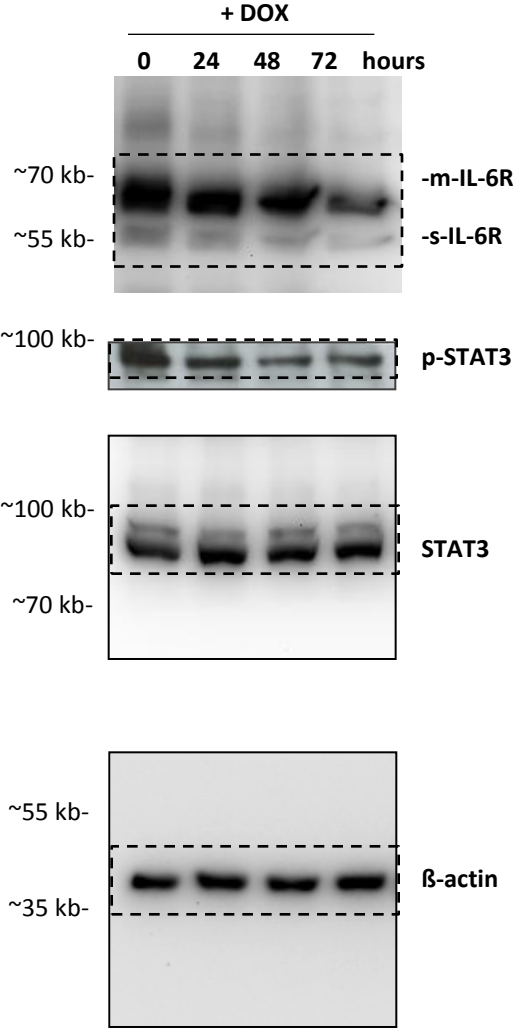

Full unedited gel for Figure 3A

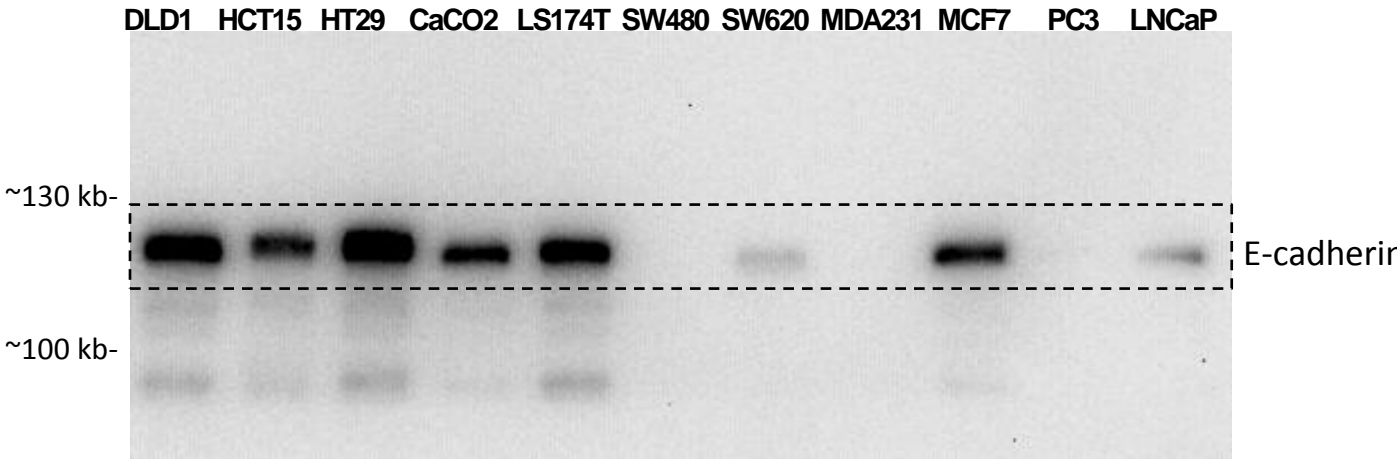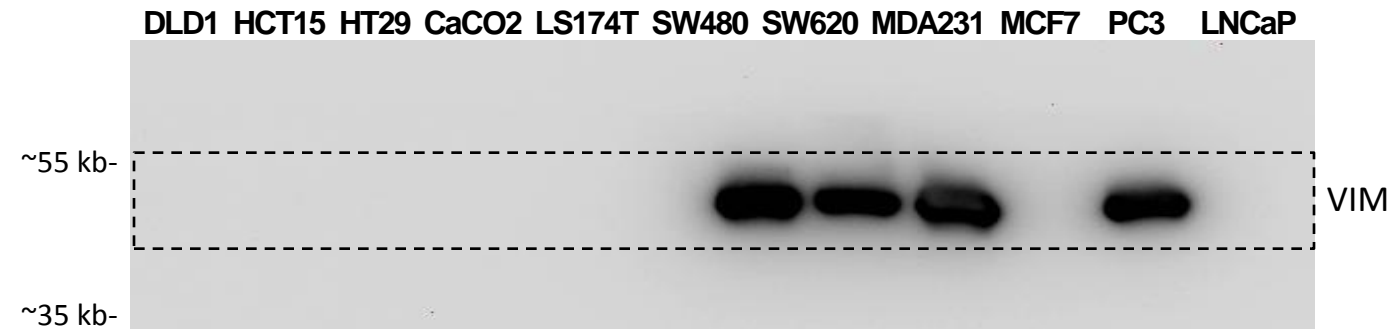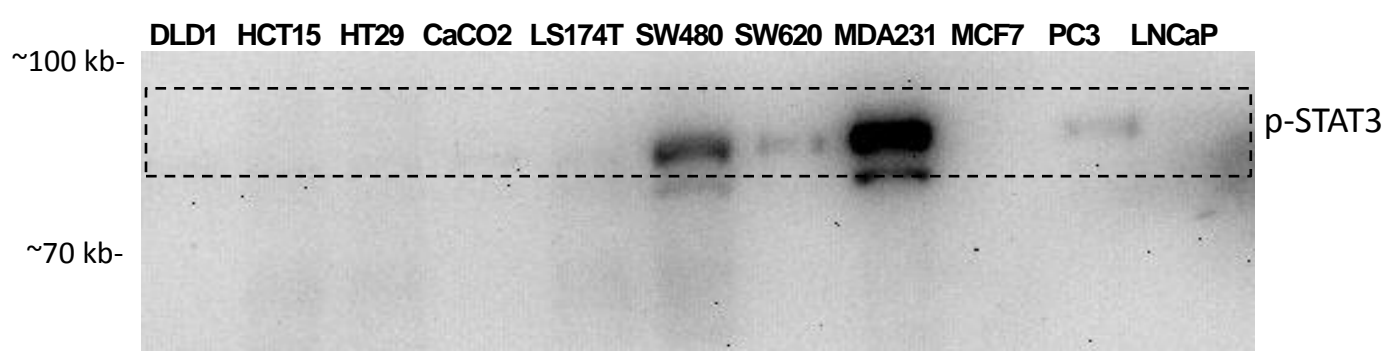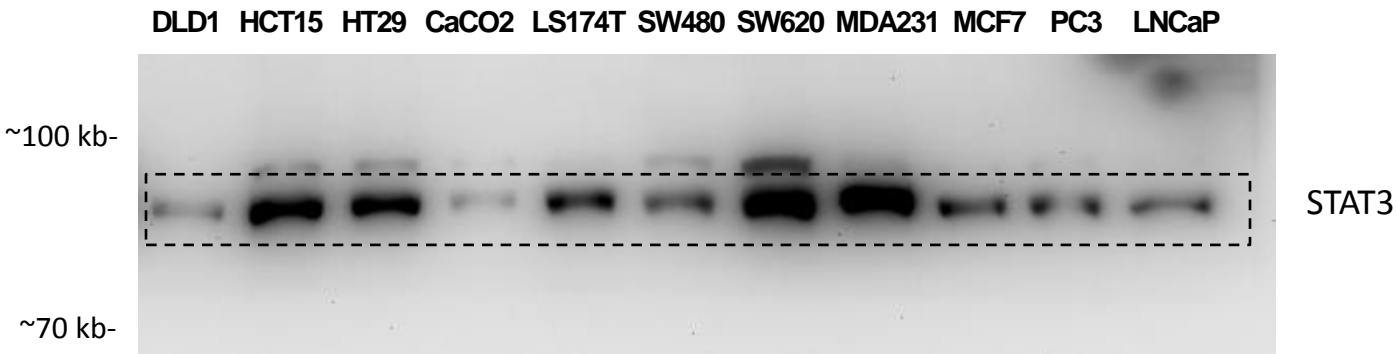

Full unedited gel for Figure 3A

DLD1 HCT15 HT29 CaCO2 LS174T SW480 SW620 MDA231 MCF7 PC3 LNCaP

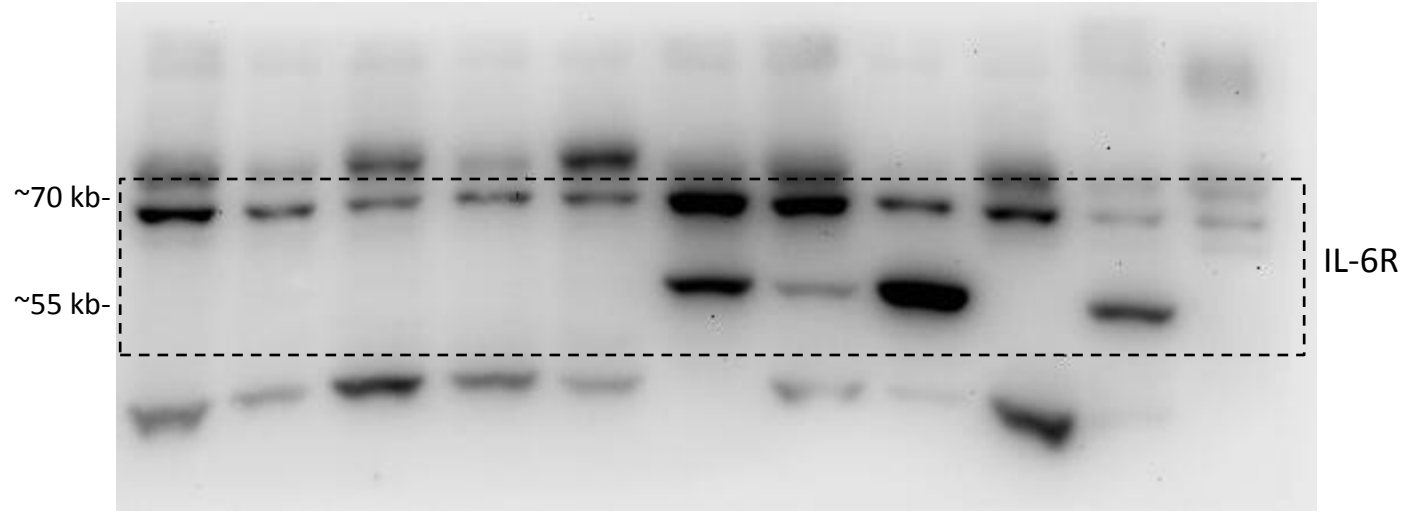

DLD1 HCT15 HT29 CaCO2 LS174T SW480 SW620 MDA231 MCF7 PC3 LNCaP

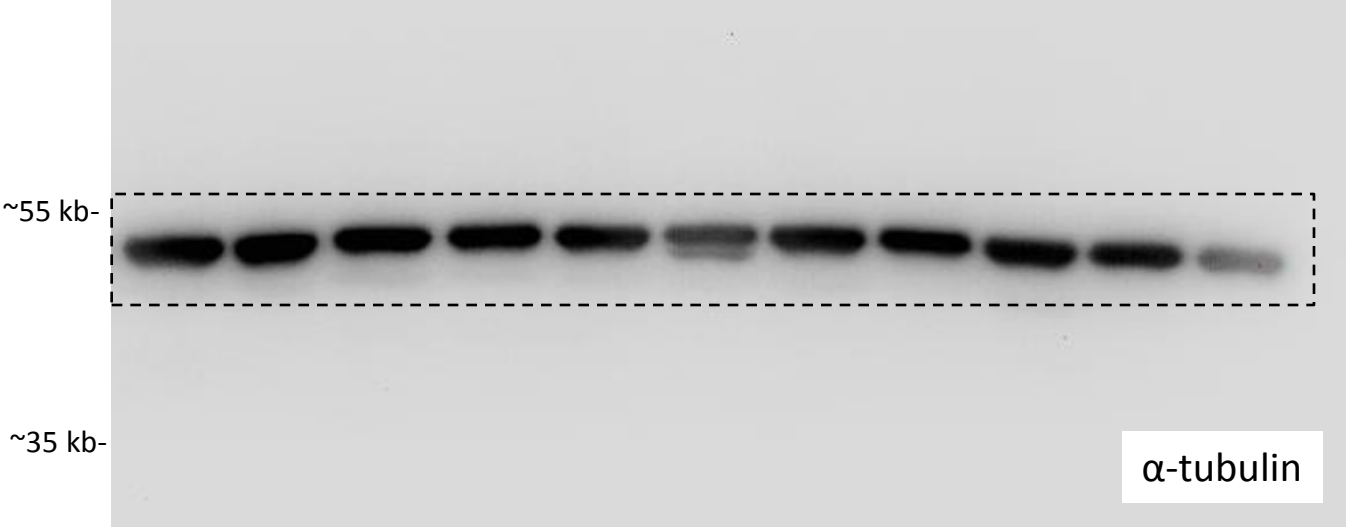

Full unedited gel for Figure 3B

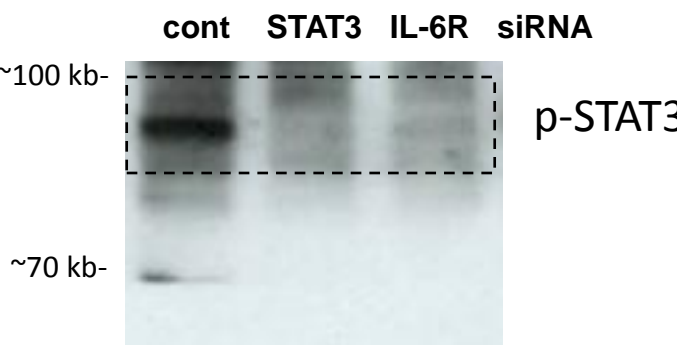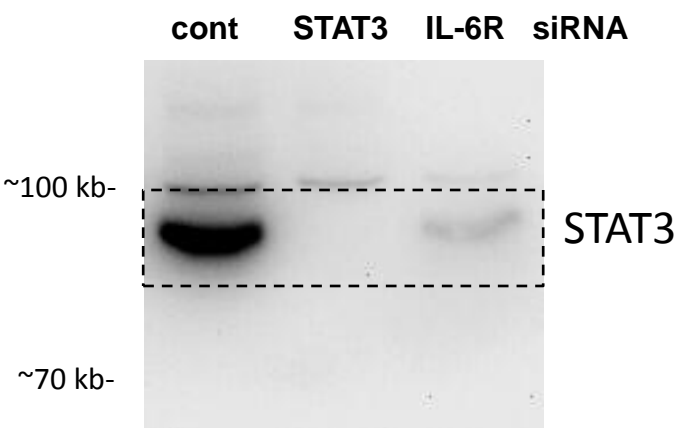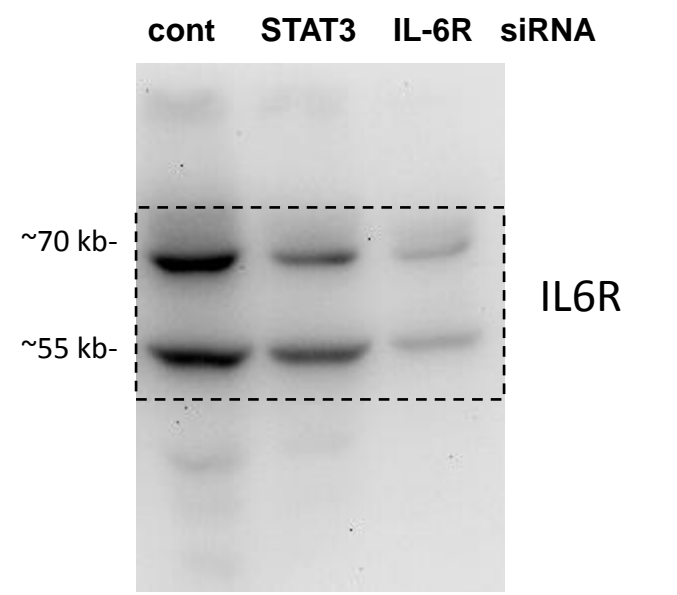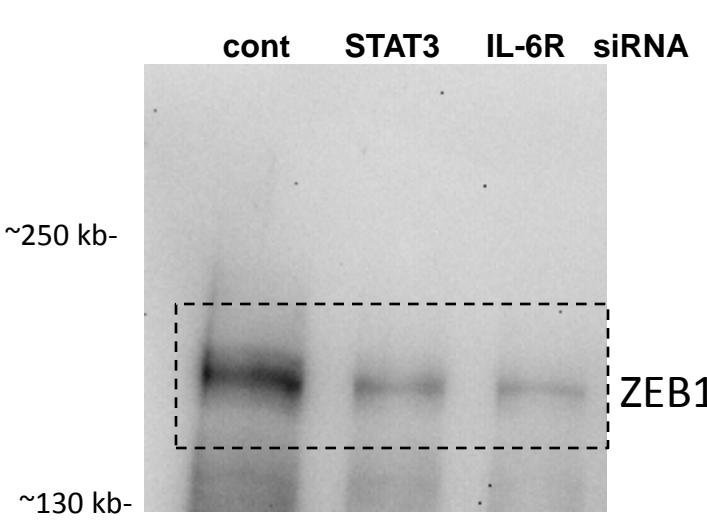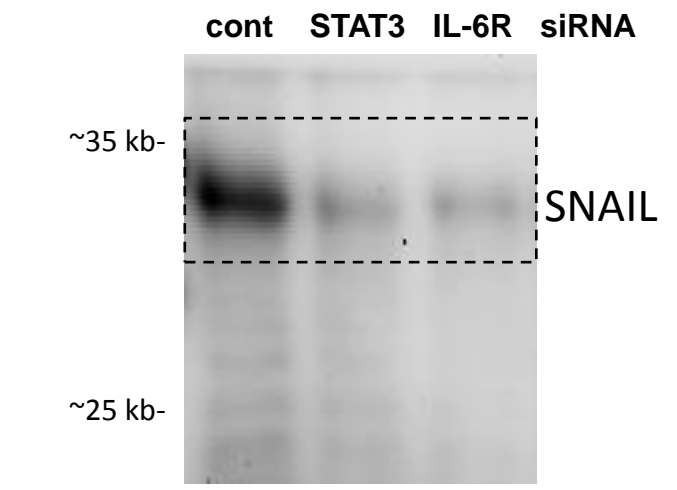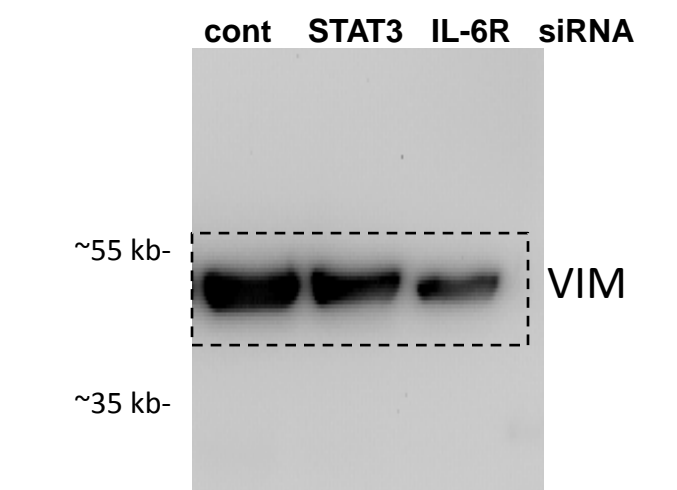

Full unedited gel for Figure 3B

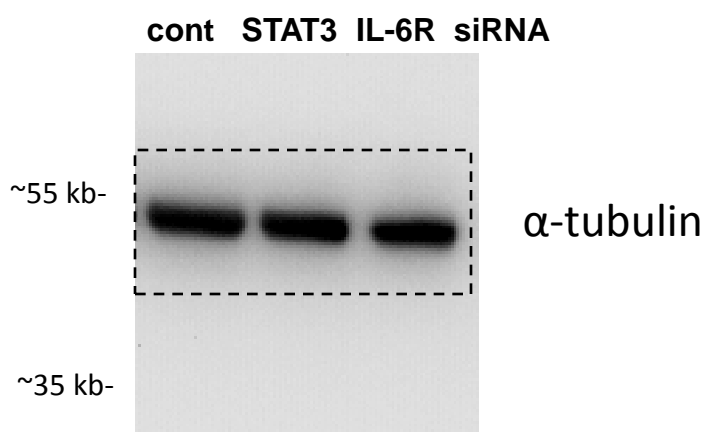

Full unedited gel for Figure 3E

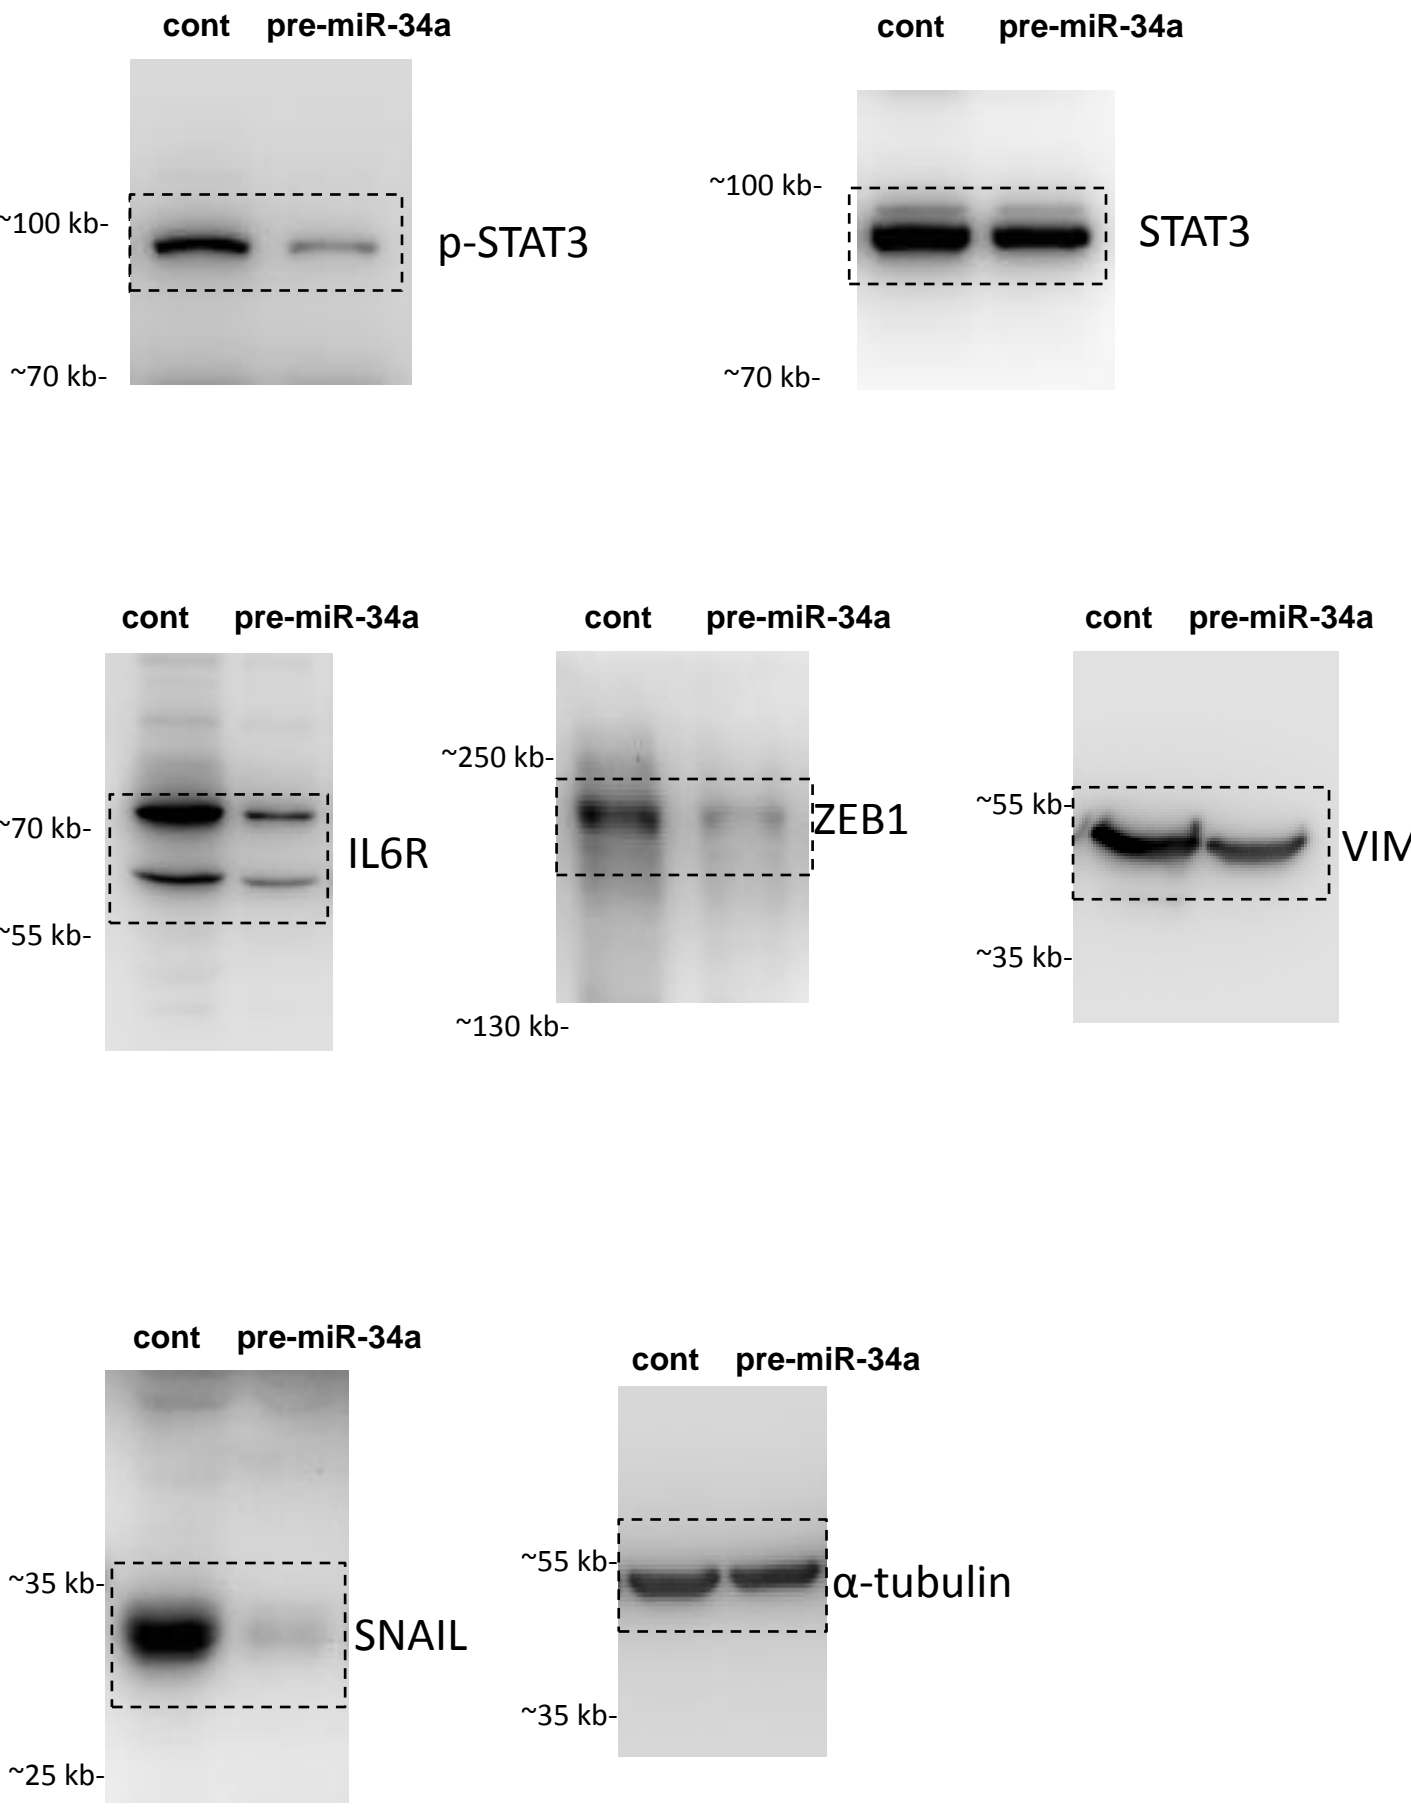



# Full unedited gel for Figure 4E

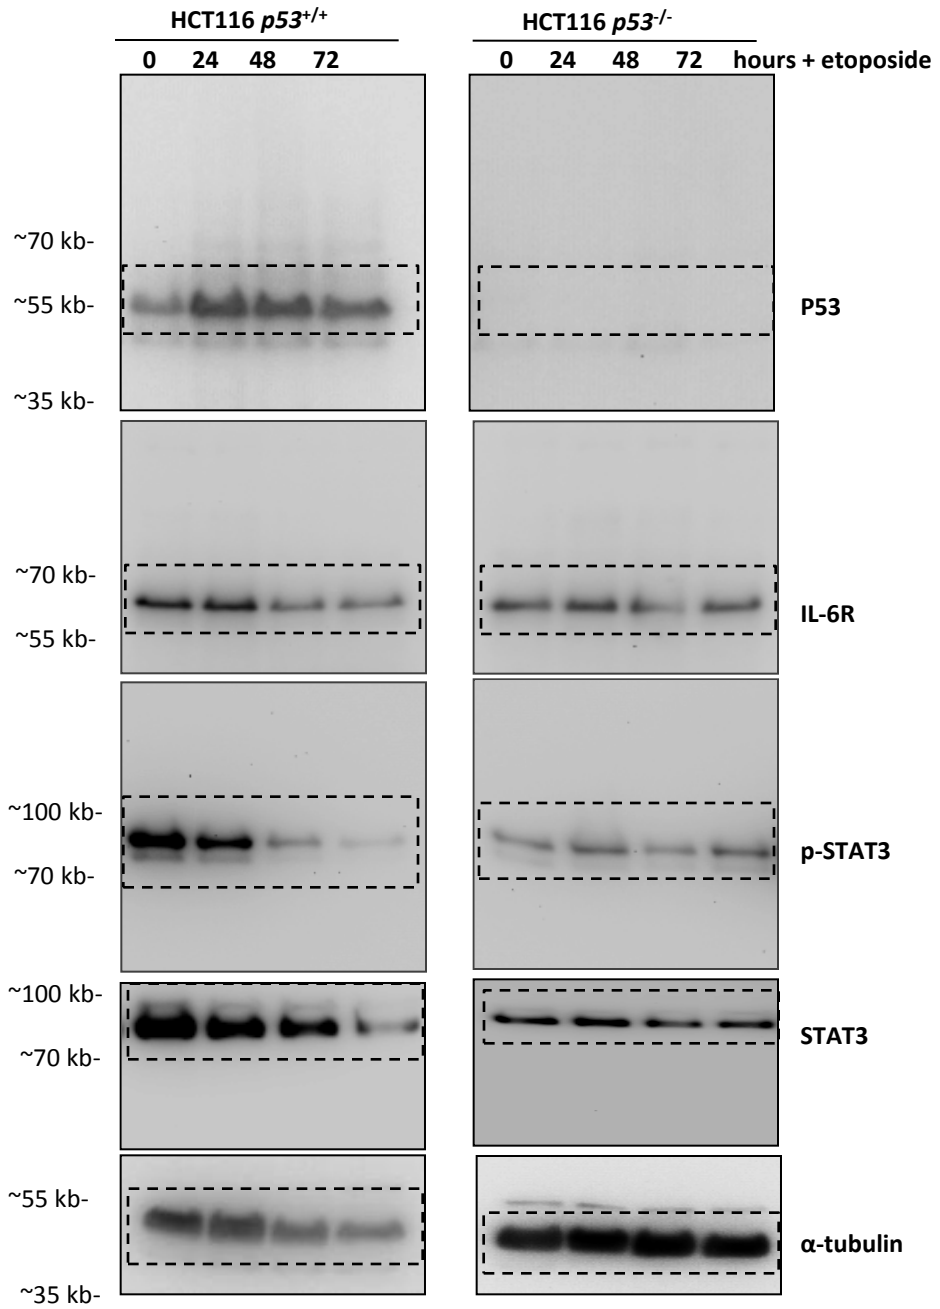

# Full unedited gel for Figure 4F

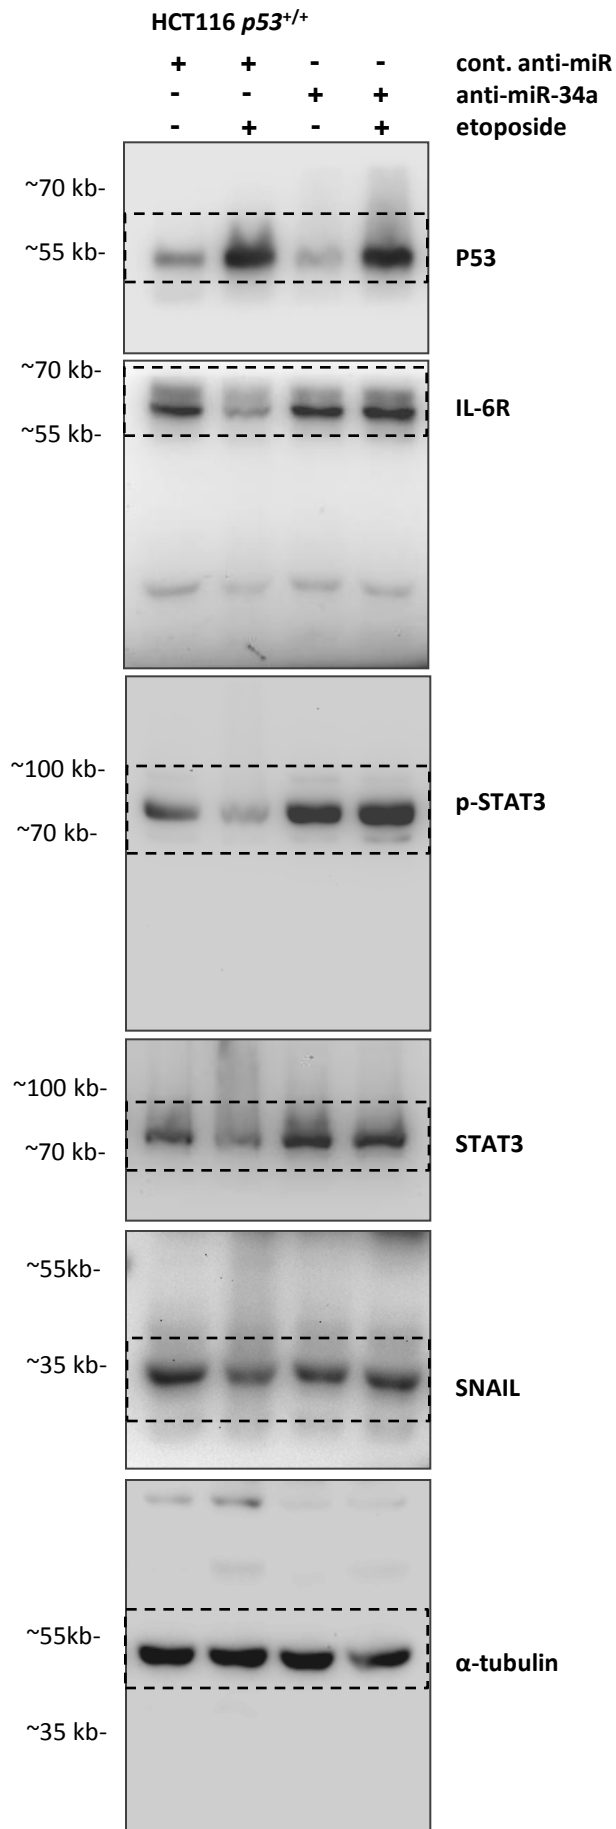

Full unedited gel for Figure 8D

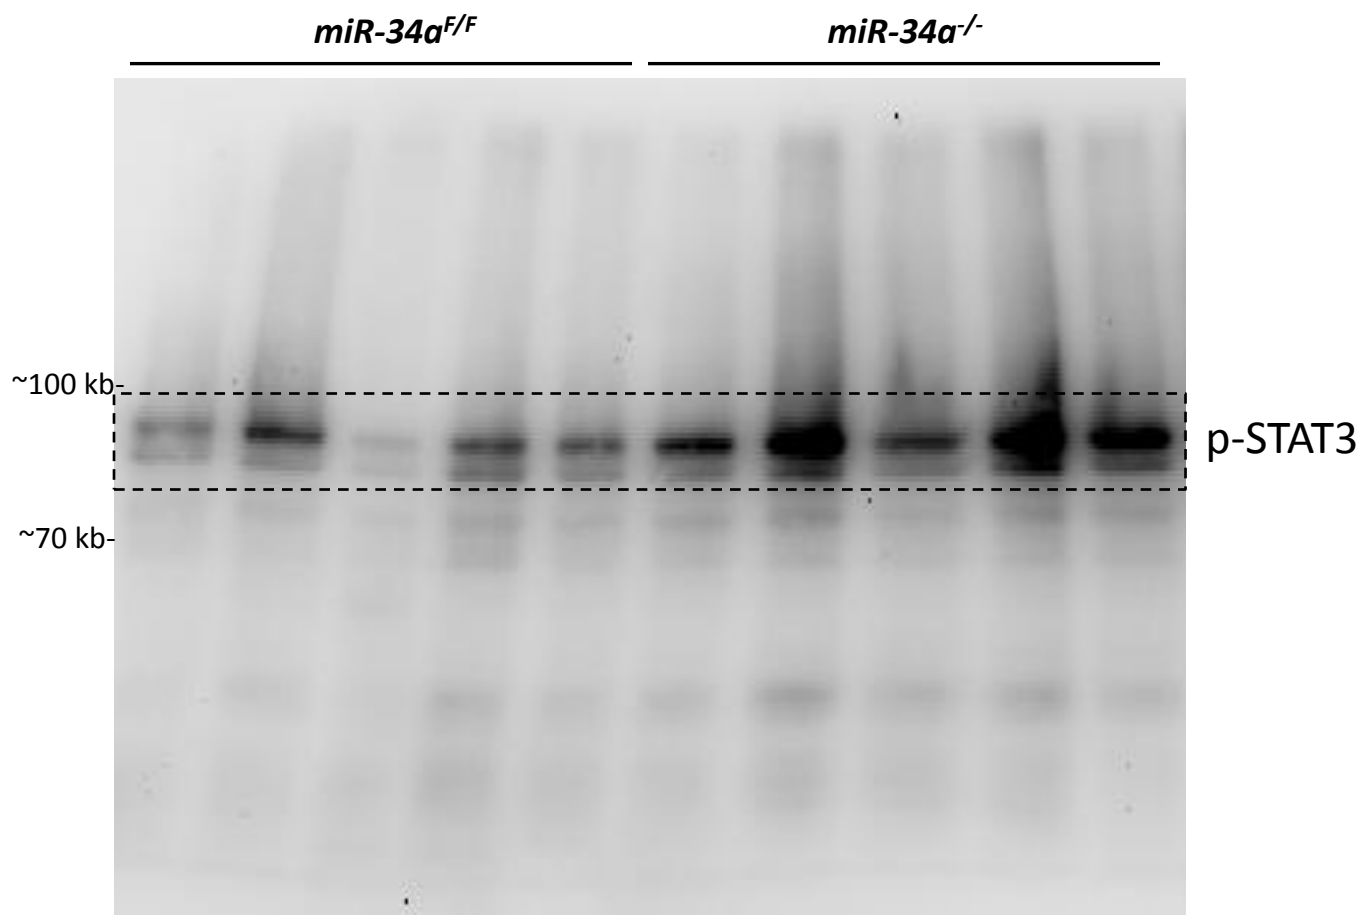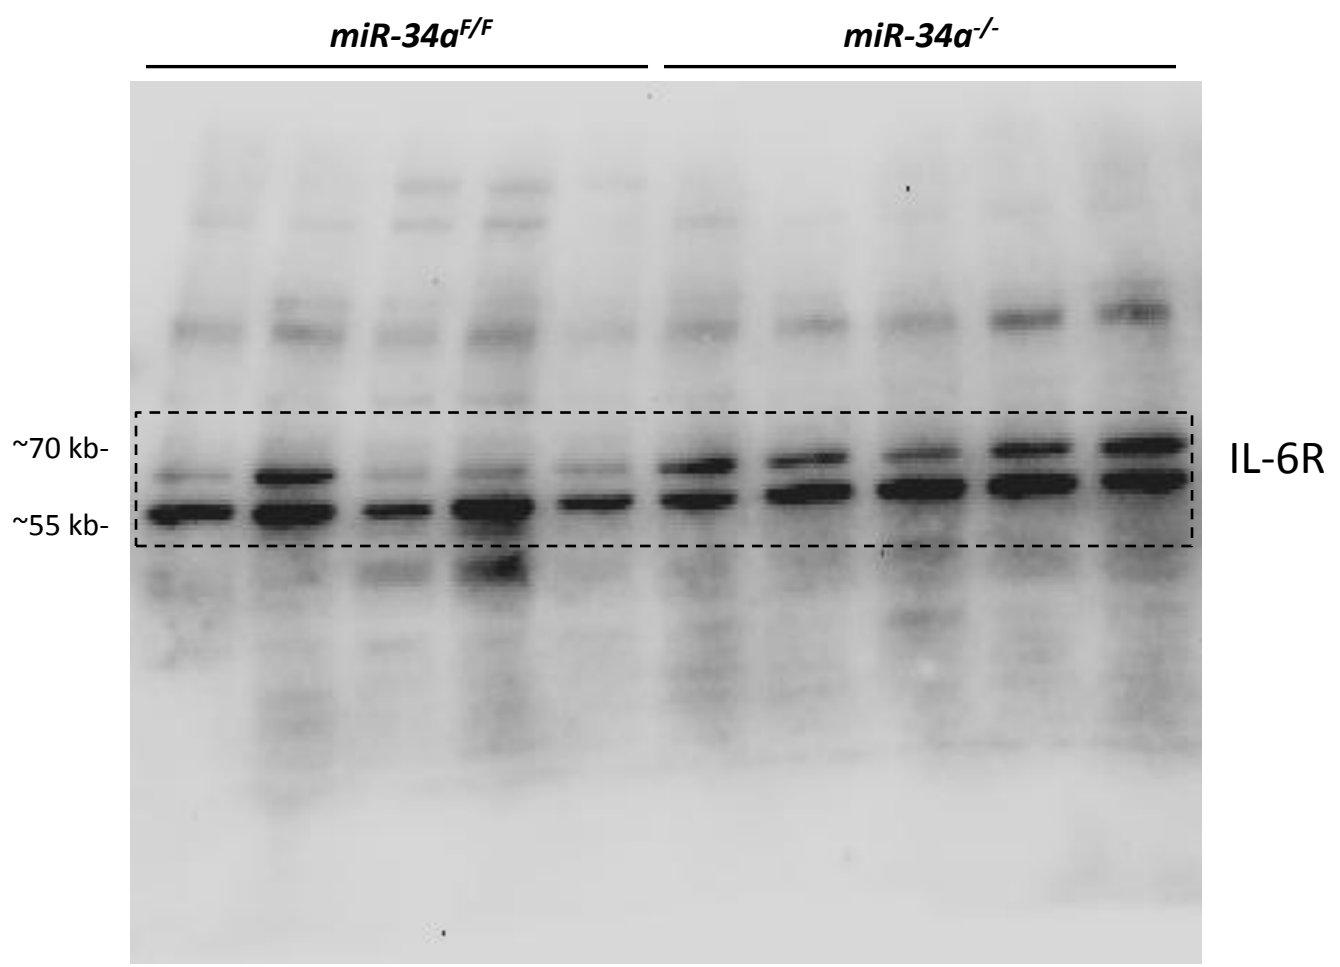

Full unedited gel for Figure 8D

*miR-34a<sup>F/F</sup>*

*miR-34a<sup>-/-</sup>*

~55 kb-

~35 kb-

SNAIL

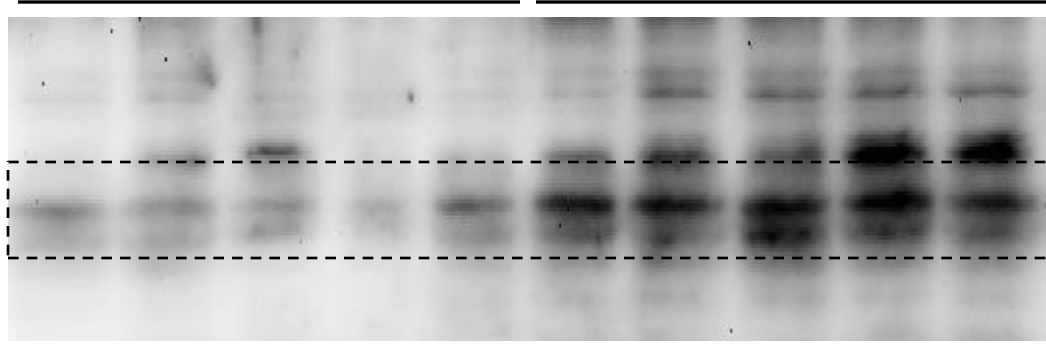

*miR-34a<sup>F/F</sup>*

*miR-34a<sup>-/-</sup>*

~250 kb-

~130 kb-

ZEB1

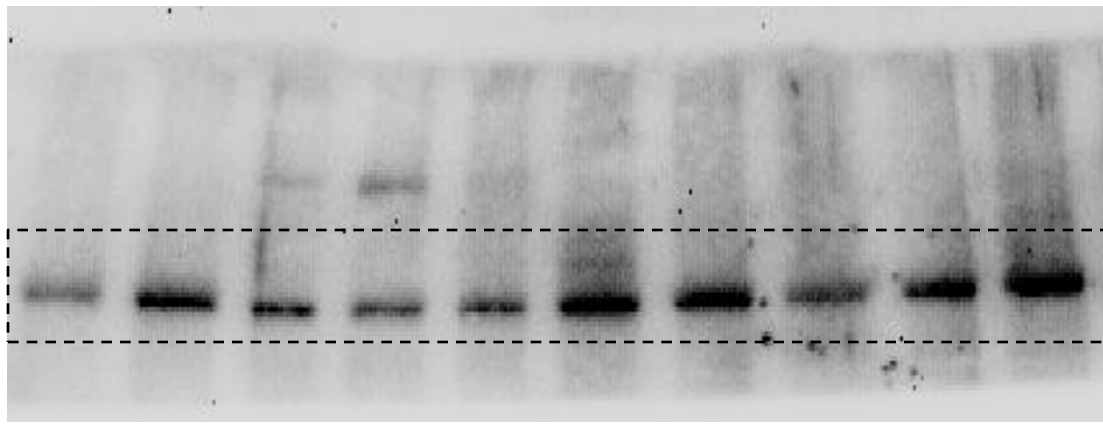

*miR-34a<sup>F/F</sup>*

*miR-34a<sup>-/-</sup>*

~55kb-

~35 kb-

$\alpha$ -tubulin

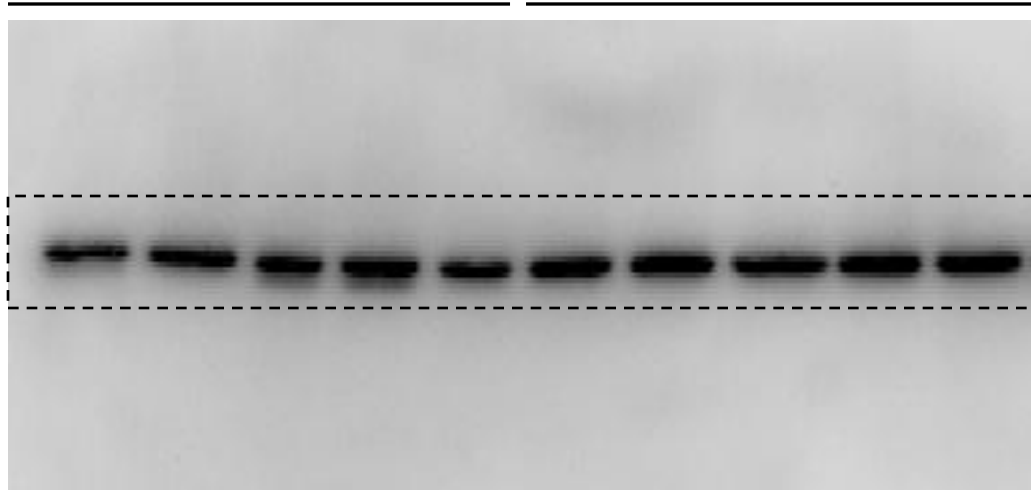

Full unedited gel for Figure 8D

*miR-34a<sup>F/F</sup>*

*miR-34a<sup>-/-</sup>*

~100 kb-

~70 kb-

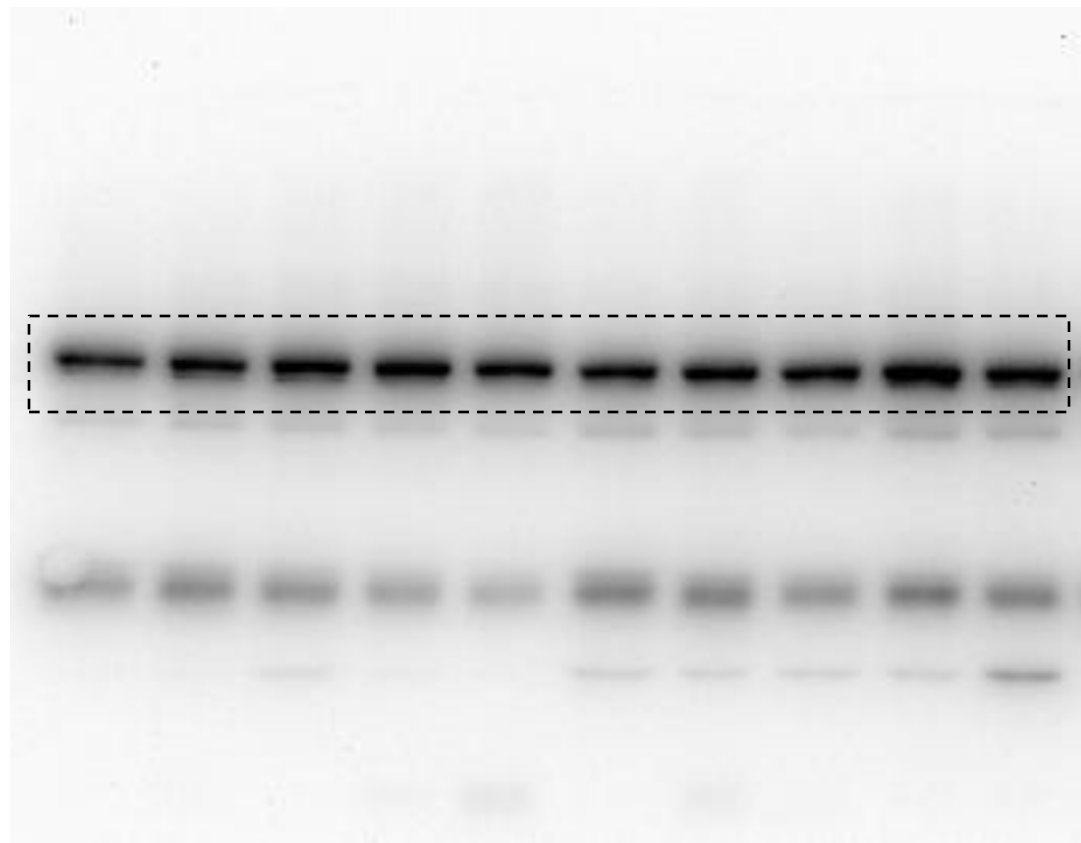

STAT3

Full unedited gel for Supplemental Figure 1A

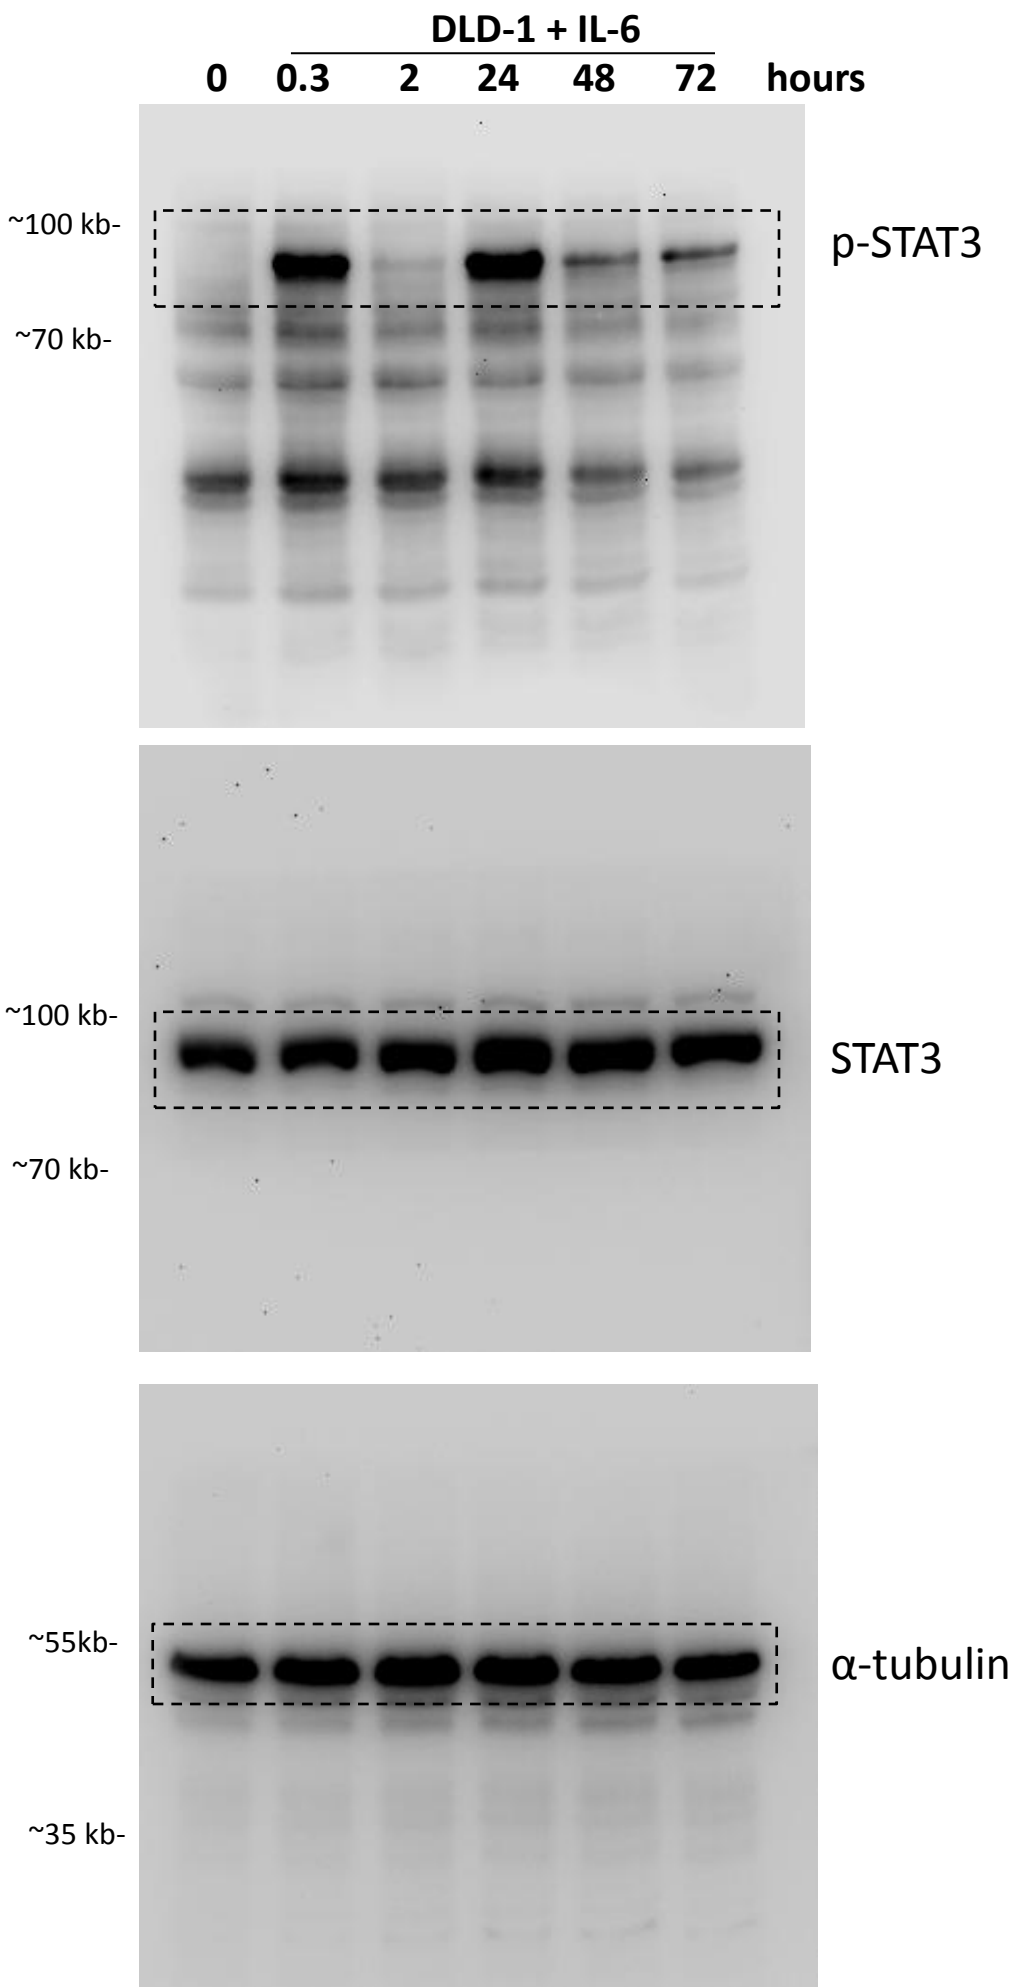

# Full unedited gel for Supplemental Figure 1B

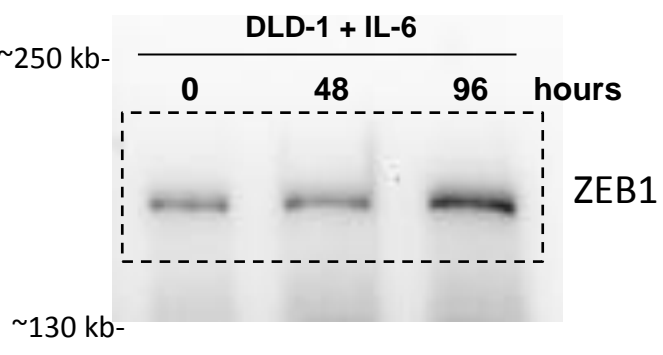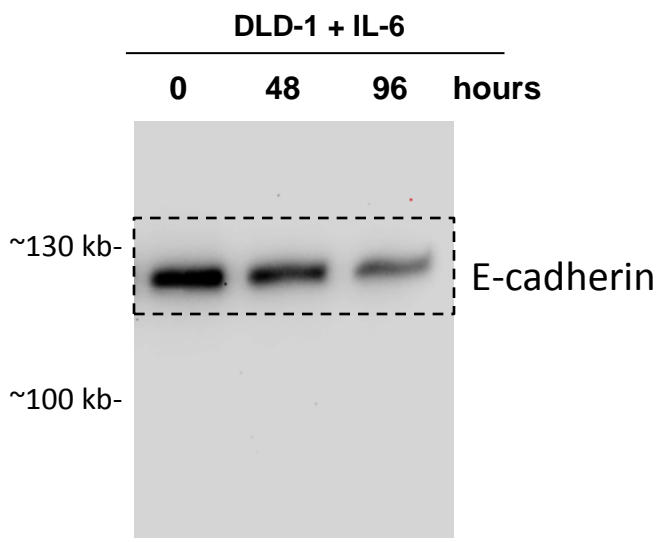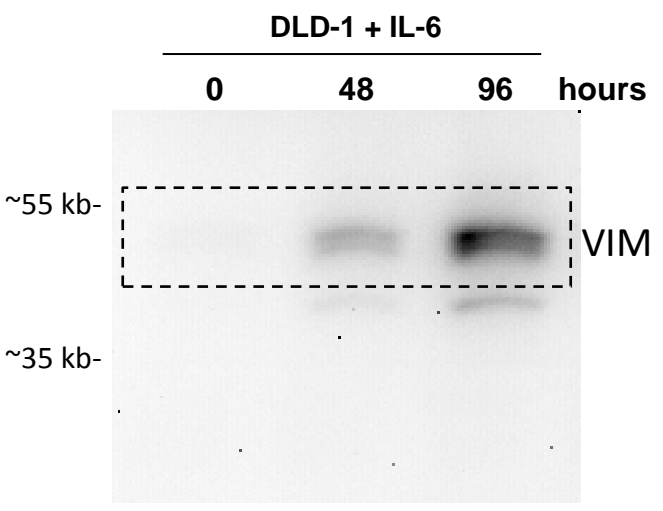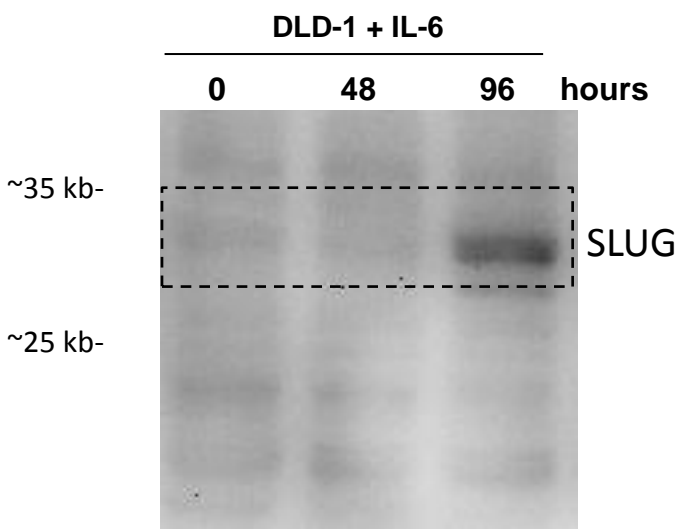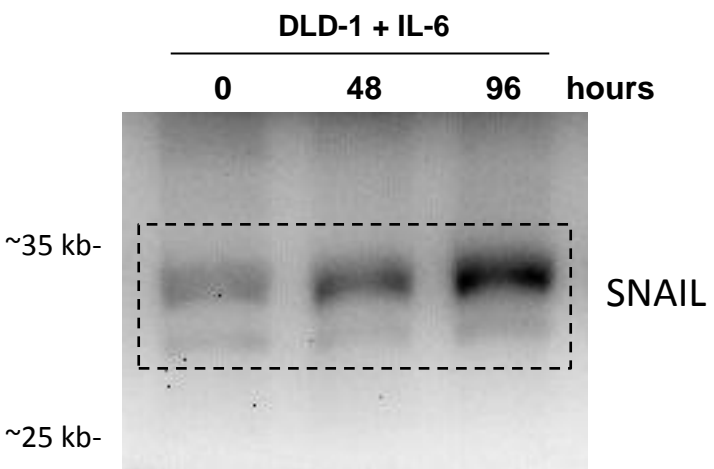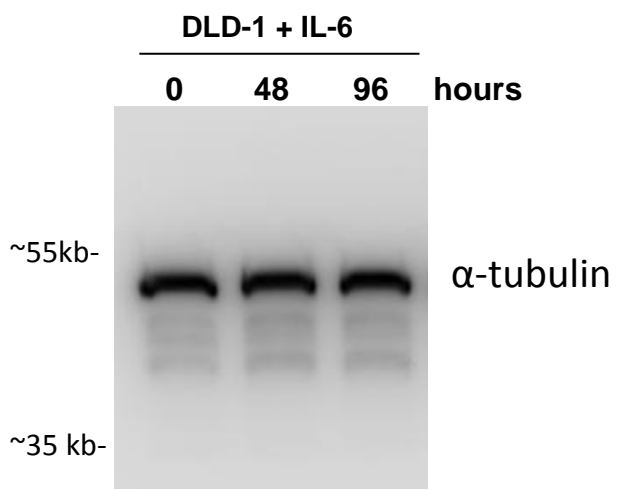

Full unedited gel for Supplemental Figure 1D

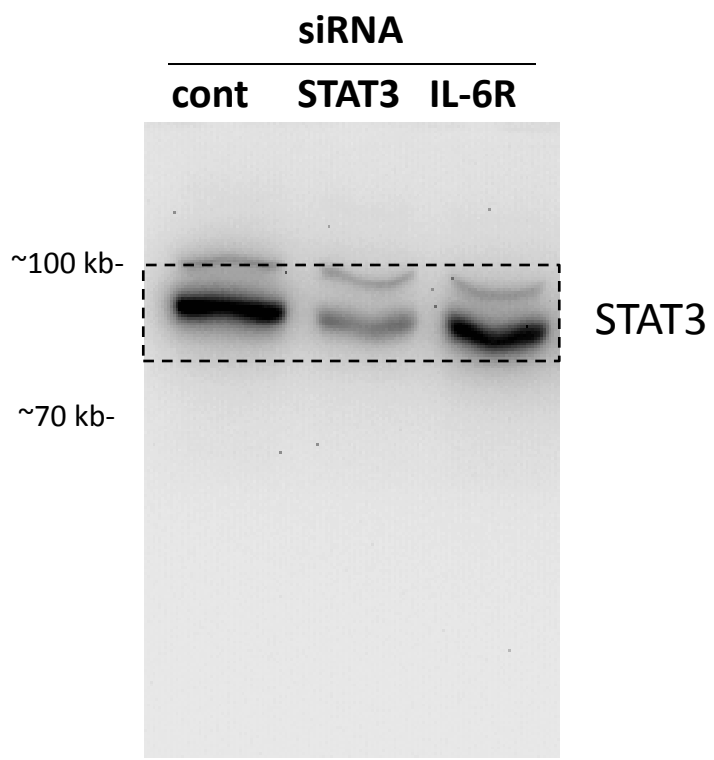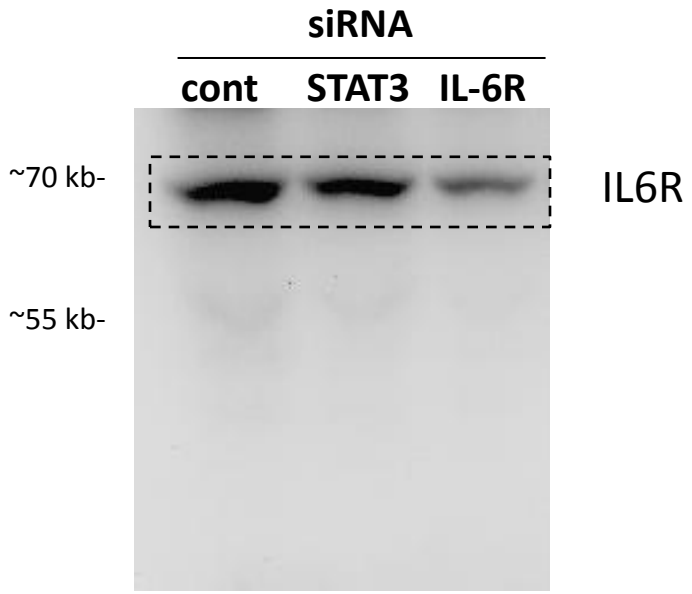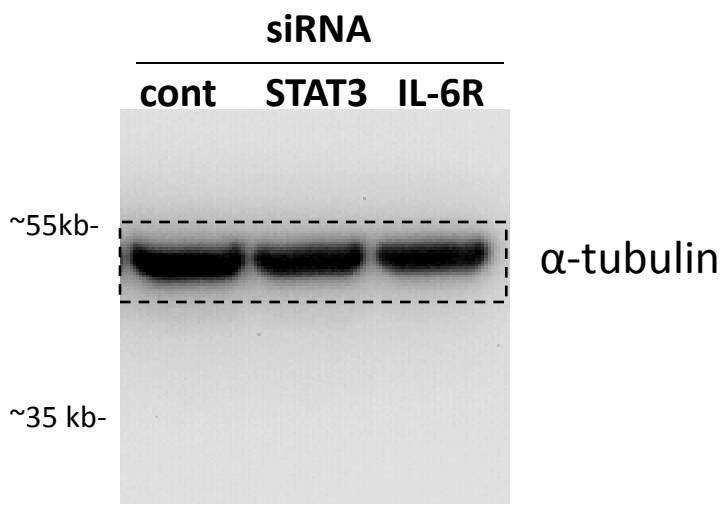



Full unedited gel for Supplemental Figure 4B

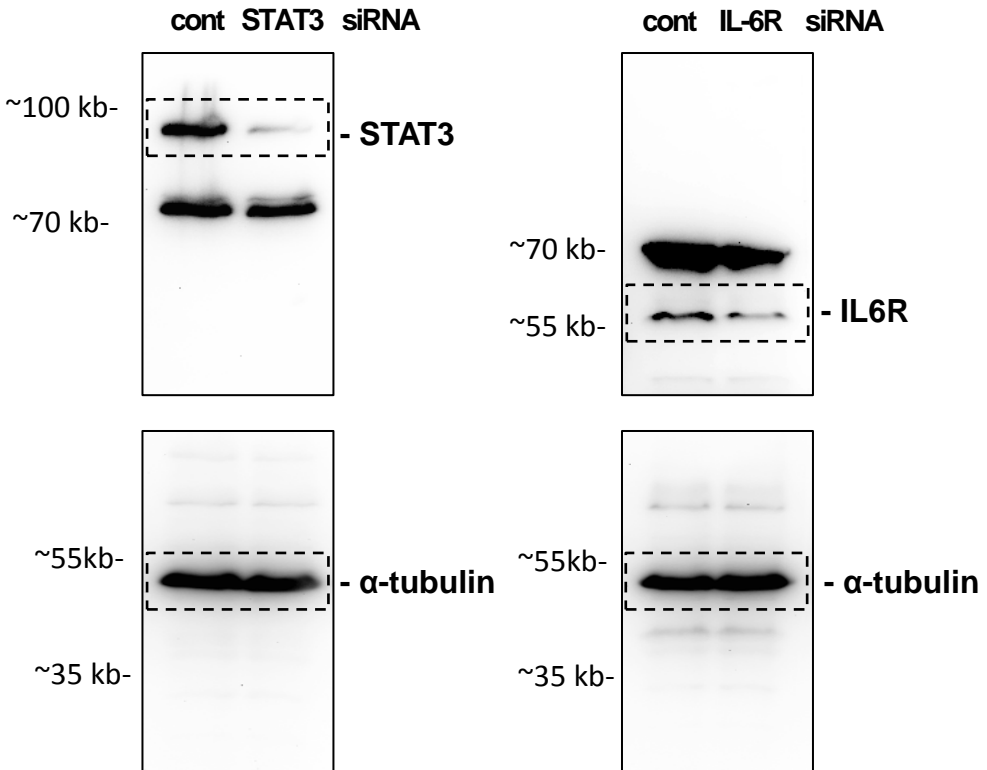

# Full unedited gel for Supplemental Figure 5A

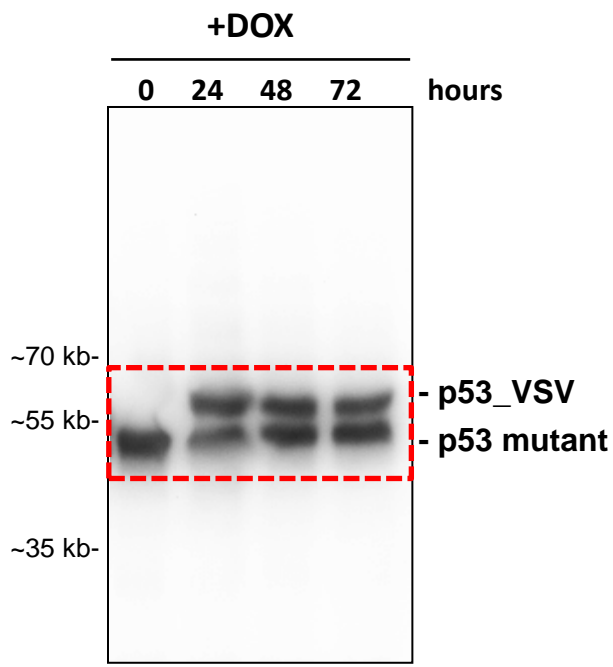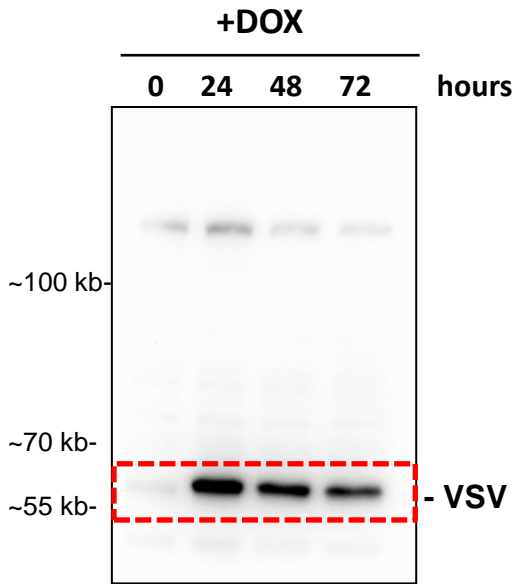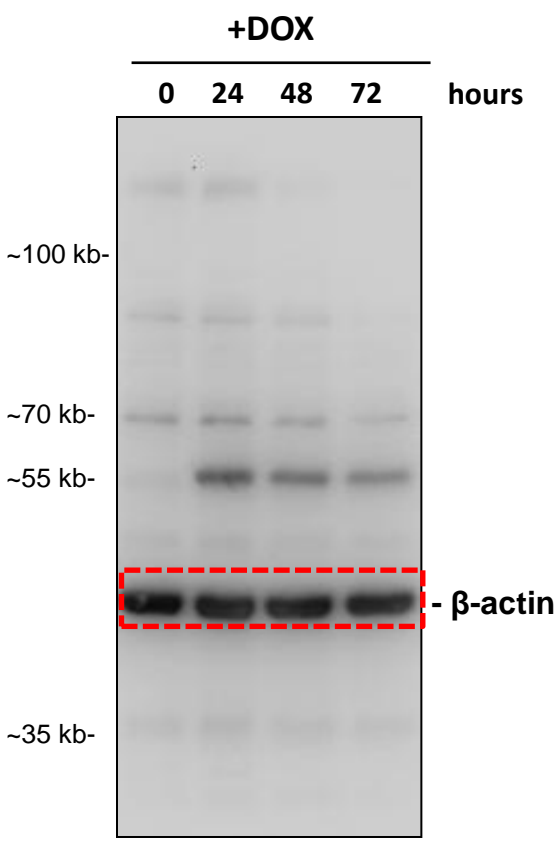

Full unedited gel for Supplemental Figure 5B

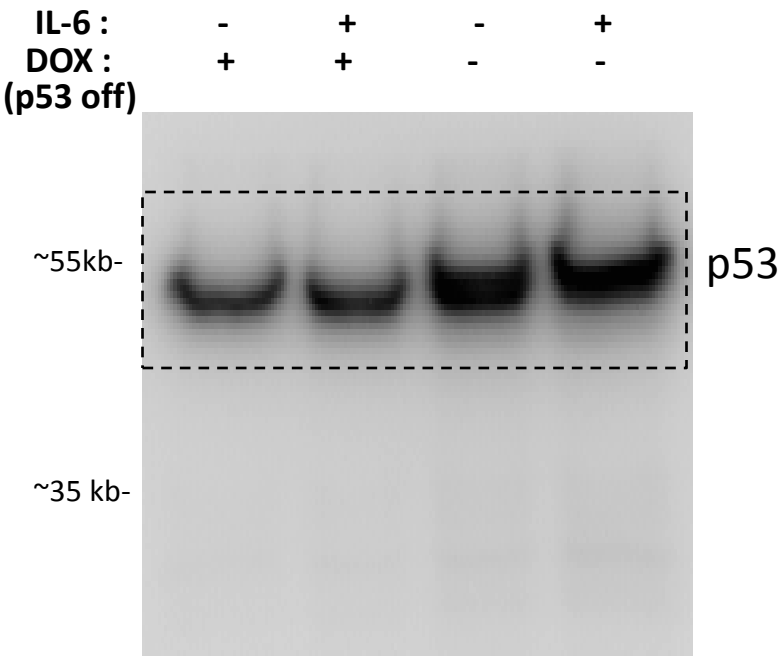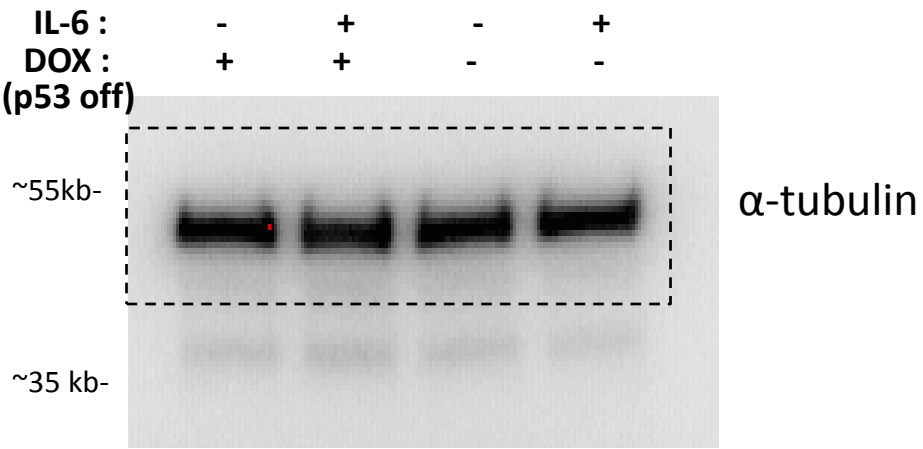

Supplement: JCI73531sd.pdf [file JCI73531sd.pdf]
